# Supplementary material
Source: PubMed Central journal article supplement (PMC9221361)
Supplement: mmc1.pdf [file mmc1.pdf]

# THE LANCET

## Infectious Diseases

### Supplementary appendix

This appendix formed part of the original submission and has been peer reviewed. We post it as supplied by the authors.

Supplement to: Higdon MM, Baidya A, Walter KK, et al. Duration of effectiveness of vaccination against COVID-19 caused by the omicron variant. *Lancet Infect Dis* 2022; published online June 22. [https://doi.org/10.1016/S1473-3099\(22\)00409-1](https://doi.org/10.1016/S1473-3099(22)00409-1).

## Supplementary materials

*This supplementary material is hosted by The Lancet Infectious Diseases and provides supporting information for the Correspondence, “Duration of effectiveness of vaccination against COVID-19 caused by the Omicron variant,” on behalf of the authors, who remain responsible for the accuracy and appropriateness of the content. The same standards for ethics, copyright, attributions and permissions as for the article apply.*

## Contents

|                                                                                          |    |
|------------------------------------------------------------------------------------------|----|
| S1. Literature search strategy .....                                                     | 2  |
| S2. Study selection .....                                                                | 4  |
| S3. Inclusion/Exclusion Criteria.....                                                    | 5  |
| S4. Included studies .....                                                               | 7  |
| S5. Studies excluded at Step 2 .....                                                     | 15 |
| S6. Duration of primary series and first booster dose VE against Omicron infection ..... | 18 |
| S7. Meta-regression results .....                                                        | 19 |
| S8. Schematic of meta-regression results.....                                            | 20 |
| S9. PICO questions .....                                                                 | 21 |
| S10. Methods for figures in main text .....                                              | 21 |
| S11. Methods for meta-regression.....                                                    | 22 |
| S12. Risk of bias assessments.....                                                       | 24 |
| S13. Study definitions for symptomatic and severe disease .....                          | 25 |
| S14. References for supplementary materials .....                                        | 27 |

## S1. Literature search strategy

### PubMed:

("COVID-19"[tw] OR "COVID 19"[tw] OR "COVID19"[tw] OR "COVID2019"[tw] OR "COVID 2019"[tw] OR "COVID-2019"[tw] OR "novel coronavirus"[tw] OR "new coronavirus"[tw] OR "novel corona virus"[tw] OR "new corona virus"[tw] OR "SARS-CoV- 2"[tw] OR "SARSCoV2"[tw] OR "SARS-CoV2"[tw] OR "2019nCoV"[tw] OR "2019-nCoV"[tw] OR "2019 coronavirus"[tw] OR "2019 corona virus"[tw] OR "coronavirus disease 2019"[tw] OR "severe acute respiratory syndrome coronavirus 2"[nm] OR "severe acute respiratory syndrome coronavirus 2"[tw] OR "sars-coronavirus-2"[tw] OR "coronavirus disease 2019"[tw] OR "corona virus disease 2019"[tw])

AND

("COVID-19 Vaccines"[Mesh] OR "COVID-19 vaccine"[tiab] OR "mRNA-1273 vaccine" [Supplementary Concept] OR "mRNA-1273 vaccine"[tiab] OR "mRNA vaccine"[tiab] OR "mRNA COVID-19 vaccines"[tiab] OR "ChAdOx1 COVID-19 vaccine" [Supplementary Concept] OR "Ad5-nCoV vaccine" [Supplementary Concept] OR "Ad5-nCoV"[tiab] OR "Covid-19 aAPC vaccine" [Supplementary Concept] OR "Ad26.COVS vaccine" [Supplementary Concept] OR "Ad26.COVS vaccine"[tiab] OR "adenoviral vector vaccine"[tiab] OR "BNT162 vaccine" [Supplementary Concept] OR "BNT162b2"[tiab] OR "BNT162"[tiab] OR "CoronaVac" [tiab] OR "vaccin\*"[tiab])

AND

("Clinical Trial, Phase IV" [Publication Type] OR "Controlled Clinical Trial" [Publication Type] OR "Randomized Controlled Trial" [Publication Type] OR "Case-Control Studies"[Mesh] OR "Retrospective Studies"[Mesh] OR "Retrospective"[tiab] OR "Cohort Studies"[Mesh] OR "Prospective Studies"[Mesh] OR "Prospective"[tiab] OR "Longitudinal Studies"[Mesh] OR "Follow-Up Studies"[Mesh] OR "Follow-up studies"[tiab] OR "cohort"[tiab] OR "test negative"[tiab] OR "Observational cohort"[tiab] OR "Test-negative design"[tiab] OR "RCT"[tiab] OR "randomized"[tiab] OR "randomised"[tiab] OR "randomly allocated"[tiab] OR "case-control"[tiab] OR "real-world effectiveness"[tiab] OR "effectiveness"[tiab] OR "association"[tiab] OR "impact"[tiab] OR "vaccine impact"[tiab]) NOT ("Clinical Trial, Phase I" [Publication Type] OR "Clinical Trial, Phase II" [Publication Type]) NOT ("animals"[mesh] NOT ("animals"[mesh] AND "humans"[mesh]))

### Embase:

('COVID-19' OR 'COVID 19' OR 'COVID19' OR 'COVID2019' OR 'COVID 2019' OR 'COVID-2019' OR 'novel coronavirus' OR 'new coronavirus' OR 'novel corona virus' OR 'new corona virus' OR 'SARS-CoV-2' OR 'SARSCoV2' OR 'SARS-CoV2' OR '2019nCoV' OR '2019-nCoV' OR '2019 coronavirus' OR '2019 corona virus' OR 'coronavirus disease 2019' OR 'severe acute respiratory syndrome coronavirus 2'/exp OR 'severe acute respiratory syndrome coronavirus 2' OR 'sars-coronavirus-2' OR 'coronavirus disease 2019'/exp OR 'coronavirus disease 2019' OR 'corona virus disease 2019')

AND

('SARS-CoV-2 vaccine'/exp OR 'COVID-19 vaccine':ti,ab OR 'mRNA-1273 vaccine'/exp OR 'mRNA-1273 vaccine':ti,ab OR 'mRNA vaccine':ti,ab OR 'mRNA COVID-19 vaccines':ti,ab OR 'ChAdOx1 nCoV 19'/exp OR 'Ad5 nCoV vaccine'/exp OR 'Ad5- nCoV':ti,ab OR 'Covid-19 aAPC vaccine':ti,ab OR 'Ad26.COVS vaccine'/exp OR 'Ad26.COVS vaccine':ti,ab OR 'adenoviral vector vaccine':ti,ab OR 'BNT 162 vaccine'/exp OR 'BNT162b2':ti,ab OR 'BNT162':ti,ab OR 'CoronaVac'/exp OR 'coronavac':ti,ab OR 'vaccin\*':ti,ab)

AND

('phase 4 clinical trial'/exp OR 'Controlled Clinical Trial'/exp OR 'Randomized Controlled Trial'/exp OR 'Case Control Study'/exp OR 'Retrospective Study'/exp OR 'Retrospective':ti,ab OR 'Cohort analysis'/exp OR 'Prospective Study'/exp OR 'Prospective':ti,ab OR 'Longitudinal Study'/exp OR 'Follow Up'/exp OR 'Follow-up study':ti,ab OR 'cohort':ti,ab OR 'test negative':ti,ab OR 'Observational cohort':ti,ab OR 'postmarketing surveillance'/exp OR 'postmarketing surveillance':ti,ab OR 'Test-negative design':ti,ab

OR 'RCT':ti,ab OR 'randomized':ti,ab OR 'randomised':ti,ab OR 'randomly allocated':ti,ab OR 'case-control':ti,ab OR 'real-world effectiveness':ti,ab OR 'effectiveness':ti,ab OR 'association':ti,ab) NOT ('phase 1 clinical trial'/exp OR 'phase 2 clinical trial'/exp) NOT ('animal'/exp NOT ('animal'/exp AND 'human'/exp)) NOT 'conference abstract'/it

WHO COVID Global Literature Database:

("COVID-19 Vaccines" OR "COVID-19 vaccine" OR "mRNA-1273 vaccine" OR "mRNA vaccine" OR "mRNA COVID-19 vaccines" OR "ChAdOx1 COVID-19 vaccine" OR "Ad5- nCoV" OR "Covid-19 aAPC vaccine" OR "Ad26.COVS vaccine" OR "adenoviral vector vaccine" OR "BNT162b2" OR "BNT162" OR "CoronaVac" OR vaccin\*)

AND

("Phase IV" OR "Controlled Clinical Trial" OR "Randomized Controlled Trial" OR "Case- Control Studies" OR "Retrospective" OR "Cohort Studies" OR "Prospective" OR "Longitudinal Studies" OR "Follow-Up Studies" OR "Follow-up study" OR "cohort" OR "test negative" OR "Observational cohort" OR "Test-negative design" OR "RCT" OR "randomized" OR "randomised" OR "randomly allocated" OR "case-control" OR "real- world effectiveness" OR "effectiveness" OR "association") AND NOT ("Phase I" OR "Phase II")

SCOPUS:

TITLE-ABS-KEY("novel coronavir\*" OR "novel corona virus\*" OR "2019 coronavirus" OR betacoronavir\* OR covid19 OR "covid 19" OR ncov OR "CoV 2" OR cov2 OR sarscov2 OR sars-cov OR sarscov OR 2019ncov OR 2019-nCoV OR "novel CoV" OR "coronavirus infections") AND TITLE-ABS-KEY(Vaccin\* AND (effectiveness OR efficacy OR protection\*) AND (postmarketing OR approved OR (post\* W/5 approval) OR "real world" OR "phase IV" OR "phase 4" OR observational OR longitudinal OR spread OR transmission OR (rate\* W/5 infection\*) OR (reduc\* W/5 infection\*) OR "general population"))

Web of Science:

(TI=(covid-19 vaccine effectiveness )) OR AB=(covid-19 vaccine effectiveness )

medRxiv, bioRxiv, SSRN, Europe PMC, Research Square, Knowledge Hub:

"COVID-19 vaccine effectiveness" OR "COVID-19 vaccine efficacy"

In addition to the above databases, MMWR and Eurosurveillance are hand-searched weekly for new studies meeting eligibility criteria.

## S2. Study Selection

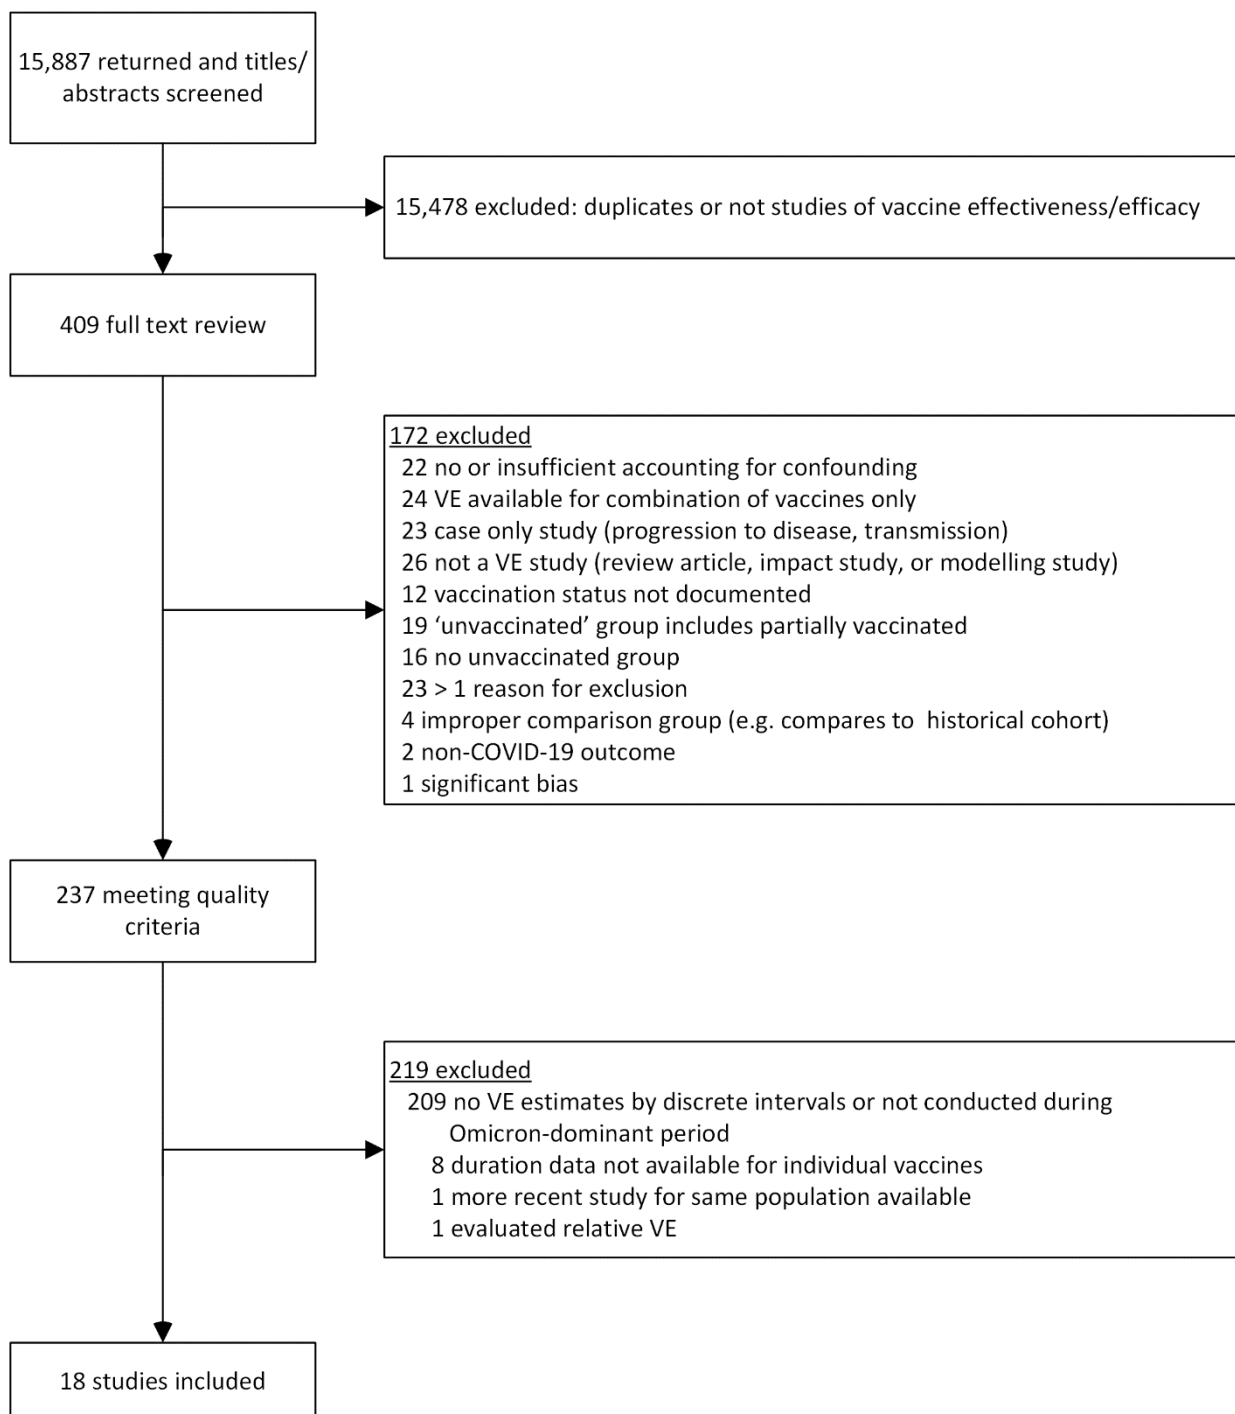

### **S3. Inclusion and exclusion criteria for search for VE studies**

Identification of eligible vaccine effectiveness studies was a two-step process. First, as part of a larger effort, all studies that estimate VE of COVID-19 vaccines are identified. Second, studies meeting criteria for estimating waning VE against Omicron were selected among these.

#### **Step 1. Identifying vaccine effectiveness studies**

All primary research studies of vaccine effectiveness underwent initial full-text review by 2 independent reviewers (AB and KKW) with additional review by 2 senior team members (MMH and MKP). During full-text review, a vaccine effectiveness study was initially excluded if it did not contain at least one vaccine effectiveness estimate that met all the following quality criteria. This was done to ensure a baseline level of quality and/or comparability of estimates for real-world studies.

#### Inclusion criteria

- Published or preprint studies or reports with adequate scientific details.
- VE estimates must have confidence intervals around the estimate (except in those cases where it is unable to be calculated) and values of estimates must be presented clearly.
- All studies must include persons with and without the clinical outcome under investigation.
- All studies of primary series vaccine effectiveness must compare persons with and without vaccination; studies of booster dose vaccine effectiveness must compare persons with and without a booster dose (either unvaccinated or persons having completed primary series vaccination without a booster).
- Due to the effect of confounders, the study design must account for confounding either by matching or by adjusting for confounders in the analysis. At a minimum, the study must adjust for or match by age and calendar time. Studies that report only unmatched and unadjusted VE estimates may be included if the authors report that adjustment was performed and no difference in results was observed.
- All outcomes must be laboratory confirmed (by PCR, genomic sequencing or rapid antigen testing).
- At least 90% of participants must have a confirmed vaccination status, rather than relying on recall.
- Study must assess vaccine effectiveness of a COVID-19 vaccine on SARS-COV-2/COVID-19-specific outcomes (i.e., infection, symptomatic disease, severe disease/death)

#### Exclusion criteria

- Press releases, presentations, or media reports
- Review articles, modelling studies, impact studies
- Estimates only available from a low-resolution chart will be excluded
- Case only studies, such as progression to disease and transmission studies
- The study uses a modelled comparison group or compares to a historical cohort
- Studies with syndromic outcomes without laboratory confirmation
- Study includes days 0-12 post-vaccination in unvaccinated definition
- Presence of significant bias as determined by expert consensus
- Unvaccinated group is restricted to persons previously infected with SARS-CoV-2
- Effectiveness estimates provided for a combination of vaccines rather than individual vaccines (exception is for mRNA vaccines)

## Step 2. Identifying studies of vaccine effectiveness over time against Omicron

After application of the above initial quality criteria, a second set of criteria were applied to determine inclusion for this specific analysis.

### Inclusion criteria

- Study presented vaccine effectiveness estimates during a period when Omicron was the dominant circulating variant as noted by the authors or presented vaccine effectiveness estimates specifically against Omicron (i.e. Omicron cases were confirmed by genomic sequencing).
- Study presented vaccine effectiveness estimates for at least two discrete time intervals after receipt of the final dose in the primary series or of a booster dose.

### Exclusion criteria

- Effectiveness estimates provided for the mRNA vaccines combined. While initial inclusion criteria allowed for studies reporting a combined VE estimate for the mRNA vaccines, differences between the mRNA vaccines have now been reported, particularly for Omicron (see summary of vaccine effectiveness studies on [www.VIEW-hub.org](http://www.VIEW-hub.org)). Of note, for all evaluations combining vaccines, an unbiased estimate of the rate of decline in VE could only be obtained if overall VE does not differ between the evaluated vaccines and if the proportion of the study population receiving each vaccine is constant over time. Because both of these conditions could be verified in such evaluations, this exclusion criterion was added.
- A more recent study provides more up-to-date or more appropriate vaccine effectiveness estimates for the same population (e.g. a study that only provides estimates for a sub-population of previously infected persons would be excluded if another study provided estimates for the entire population regardless of prior infection)
- Study evaluated relative vaccine effectiveness (i.e. for booster studies the reference group was persons having completed a primary series rather than unvaccinated persons)

#### S4. Characteristics and Results of Included Vaccine Effectiveness Studies against Omicron

| Study First Author (Country) | Study Design (Variables controlled for in vaccine effectiveness estimates)                                                                                                                                                                                                                                                 | Testing Period              | Study population (years) | PRIMARY SERIES              |                     |                                       |                                | BOOSTER                     |                  |                                         |                                |                |
|------------------------------|----------------------------------------------------------------------------------------------------------------------------------------------------------------------------------------------------------------------------------------------------------------------------------------------------------------------------|-----------------------------|--------------------------|-----------------------------|---------------------|---------------------------------------|--------------------------------|-----------------------------|------------------|-----------------------------------------|--------------------------------|----------------|
|                              |                                                                                                                                                                                                                                                                                                                            |                             |                          | Vaccine                     | Disease Outcome*    | Time interval since final dose (days) | Vaccine effectiveness (95% CI) | Vaccine                     | Disease Outcome* | Time interval since booster dose (days) | Vaccine effectiveness (95% CI) |                |
| Baum <sup>1</sup> (Finland)  | Retrospective cohort (age, sex, region of residence, residence in a long-term care facility, influenza vaccination in 2019–2020, number of nights hospitalized between 2015 and 2019 and presence of predisposing comorbidities)                                                                                           | Dec 27, 2020 - Feb 19, 2022 | ≥70 years                | Pfizer BioNTech - Comirnaty | Severe Disease      | 14-90                                 | 91 (79-96)                     | Pfizer BioNTech - Comirnaty | Severe Disease   | 14-60                                   | 95 (94-97)                     |                |
|                              |                                                                                                                                                                                                                                                                                                                            |                             |                          |                             |                     | 91-180                                | 76 (56-86)                     |                             |                  | Moderna – mRNA-1273                     | >60                            | 90 (97-93)     |
|                              |                                                                                                                                                                                                                                                                                                                            |                             |                          |                             |                     | >180                                  | 61 (48-71)                     |                             |                  |                                         | 14-60                          | 94 (89-97)     |
|                              |                                                                                                                                                                                                                                                                                                                            |                             |                          |                             |                     | 14-90                                 | 92 (43-99)                     | Pfizer BioNTech - Comirnaty |                  | >60                                     | 48 (-13-76)                    |                |
|                              |                                                                                                                                                                                                                                                                                                                            |                             |                          |                             |                     | 91-180                                | 90 (28-99)                     |                             |                  | 14-60                                   | 96 (82-99)                     |                |
|                              |                                                                                                                                                                                                                                                                                                                            |                             |                          |                             |                     | >180                                  | 72 (43-86)                     |                             |                  | >60                                     | 100 (46.5-100)                 |                |
|                              |                                                                                                                                                                                                                                                                                                                            |                             |                          | Moderna - mRNA-1273         |                     | Severe Disease                        | 14-90                          | 92 (43-99)                  |                  | Pfizer BioNTech - Comirnaty             | 14-60                          | 96 (82-99)     |
|                              |                                                                                                                                                                                                                                                                                                                            |                             |                          |                             |                     |                                       | 91-180                         | 90 (28-99)                  |                  |                                         | >60                            | 100 (46.5-100) |
|                              |                                                                                                                                                                                                                                                                                                                            |                             |                          |                             |                     |                                       | >180                           | 72 (43-86)                  |                  |                                         | 14-60                          | 97 (92-99)     |
|                              |                                                                                                                                                                                                                                                                                                                            |                             |                          | AstraZeneca - Vaxzevria     |                     | Severe Disease                        | 91-180                         | 41 (-140-86)                |                  | Pfizer BioNTech - Comirnaty             | >60                            | 92 (79-97)     |
|                              |                                                                                                                                                                                                                                                                                                                            |                             |                          |                             |                     |                                       | >180                           | 43 (-10-70)                 |                  |                                         | 14-60                          | 98 (89-100)    |
|                              |                                                                                                                                                                                                                                                                                                                            |                             |                          |                             |                     |                                       |                                |                             |                  |                                         | >60                            | 90 (27-99)     |
|                              |                                                                                                                                                                                                                                                                                                                            |                             |                          | Moderna - mRNA-1273         | 14-60               | 100 (73.7-100)                        |                                |                             |                  |                                         |                                |                |
|                              |                                                                                                                                                                                                                                                                                                                            |                             |                          |                             | >60                 | 40 (-336-92)                          |                                |                             |                  |                                         |                                |                |
|                              |                                                                                                                                                                                                                                                                                                                            |                             |                          |                             |                     |                                       |                                |                             |                  |                                         |                                |                |
| Buchan <sup>2</sup> (Canada) | Test-negative case control (age, sex, region of residence, comorbidities, influenza vaccination, prior infection, week of testing, and neighbourhood-level information on median household income, proportion of the working population employed as non-health essential workers, mean number of persons per dwelling, and | Nov 22, 2021 - Mar 6, 2022  | 12-17 years              | Pfizer BioNTech - Comirnaty | Symptomatic disease | 7-59                                  | 51 (38-61)                     |                             |                  |                                         |                                |                |
|                              |                                                                                                                                                                                                                                                                                                                            |                             |                          |                             |                     | 60-119                                | 31 (20-41)                     |                             |                  |                                         |                                |                |
|                              |                                                                                                                                                                                                                                                                                                                            |                             |                          |                             |                     | 120-179                               | 29 (19-38)                     |                             |                  |                                         |                                |                |
|                              |                                                                                                                                                                                                                                                                                                                            |                             |                          |                             |                     | >180                                  | 29 (17-38)                     |                             |                  |                                         |                                |                |
|                              |                                                                                                                                                                                                                                                                                                                            |                             |                          |                             |                     | Severe disease                        | 7-59                           |                             |                  |                                         |                                | 76 (-10-95)    |
|                              |                                                                                                                                                                                                                                                                                                                            |                             |                          |                             |                     |                                       | 60-119                         |                             |                  |                                         |                                | 83 (55-93)     |
|                              |                                                                                                                                                                                                                                                                                                                            |                             |                          |                             |                     |                                       | 120-179                        |                             |                  |                                         |                                | 82 (64-91)     |
|                              |                                                                                                                                                                                                                                                                                                                            |                             |                          |                             |                     |                                       | >180                           |                             |                  |                                         |                                | 88 (77-94)     |





|                                  |                                                                                                                                                              |                            |                |                             |                     |                |                                         |                             |                     |                                   |                                                                              |                  |                     |                     |       |                     |
|----------------------------------|--------------------------------------------------------------------------------------------------------------------------------------------------------------|----------------------------|----------------|-----------------------------|---------------------|----------------|-----------------------------------------|-----------------------------|---------------------|-----------------------------------|------------------------------------------------------------------------------|------------------|---------------------|---------------------|-------|---------------------|
|                                  |                                                                                                                                                              |                            |                |                             | Severe disease      | 70-139<br>>139 | 68.9 (-254.3-97.3)<br>48.4 (-20.1-77.8) | Pfizer BioNTech - Comirnaty | Severe disease      | 14-34<br>35-62<br>63-90<br>91-174 | 81.8 (55.0-92.6)<br>87.3 (69.0-94.8)<br>84.2 (59.8-93.8)<br>93.4 (69.4-98.6) |                  |                     |                     |       |                     |
|                                  |                                                                                                                                                              |                            |                |                             |                     |                |                                         | Moderna - mRNA-1273         |                     | 35-62<br>63-90<br>91-174          | 95.4 (80.9-98.9)<br>96.0 (77.6-99.3)<br>90.2 (-88.4-99.5)                    |                  |                     |                     |       |                     |
| Chemaitelly <sup>4</sup> (Qatar) | Test-negative case control (sex, 10-year age group, nationality, and calendar week of PCR test)                                                              | Dec 23, 2021 - Feb 2, 2022 | All ages       | Pfizer BioNTech - Comirnaty | Symptomatic disease | 0-29           | 61.9 (49.9-71.1)                        | Pfizer BioNTech - Comirnaty | Symptomatic disease | 7-20                              | 53.6 (47.4 to 59.1)                                                          |                  |                     |                     |       |                     |
|                                  |                                                                                                                                                              |                            |                |                             |                     | 30-59          | 45.9 (33.8-55.8)                        |                             |                     | 21-34                             | 56.6 (50.8 to 61.7)                                                          |                  |                     |                     |       |                     |
|                                  |                                                                                                                                                              |                            |                |                             |                     | 60-89          | 36.3 (25.1-45.8)                        |                             |                     | 35-48                             | 46.2 (39.7 to 52.0)                                                          |                  |                     |                     |       |                     |
|                                  |                                                                                                                                                              |                            |                |                             |                     | 90-119         | 28.5 (18.0-37.8)                        |                             |                     | 49-62                             | 38.0 (28.1 to 46.5)                                                          |                  |                     |                     |       |                     |
|                                  |                                                                                                                                                              |                            |                |                             |                     | 120-149        | 10.6 (-2.3-21.9)                        |                             |                     | 63-76                             | 43.7 (32.9 to 52.7)                                                          |                  |                     |                     |       |                     |
|                                  |                                                                                                                                                              |                            |                |                             |                     | 150-179        | 14.3 (6.2-21.8)                         |                             |                     | ≥77                               | 37.6 (28.8 to 45.4)                                                          |                  |                     |                     |       |                     |
|                                  |                                                                                                                                                              |                            |                |                             |                     | 180-209        | 9.6 (2.4-16.3)                          |                             |                     |                                   |                                                                              |                  |                     |                     |       |                     |
|                                  |                                                                                                                                                              |                            |                |                             |                     | 210-239        | -7.5 (-15.3 to -0.2)                    |                             |                     |                                   |                                                                              |                  |                     |                     |       |                     |
|                                  |                                                                                                                                                              |                            |                |                             |                     | 240-269        | 1.5 (-6.2-8.7)                          |                             |                     |                                   |                                                                              |                  |                     |                     |       |                     |
|                                  |                                                                                                                                                              |                            |                |                             |                     | 270-299        | -17.7 (-25.6 to -10.3)                  |                             |                     |                                   |                                                                              |                  |                     |                     |       |                     |
|                                  |                                                                                                                                                              |                            |                |                             |                     | 300-329        | -0.3 (-10.2-8.6)                        |                             |                     |                                   |                                                                              |                  |                     |                     |       |                     |
|                                  |                                                                                                                                                              |                            |                |                             |                     | ≥330           | 16.5 (3.1-28.1)                         |                             |                     |                                   |                                                                              |                  |                     |                     |       |                     |
|                                  |                                                                                                                                                              |                            |                |                             |                     | Severe disease | 0-179                                   |                             |                     | 73.7 (46.8-87.0)                  | Severe disease                                                               | 1-41             | 90.6 (77.8 to 96.0) |                     |       |                     |
|                                  |                                                                                                                                                              |                            |                |                             |                     |                | ≥180                                    |                             |                     | 80.7 (71.3-87.0)                  |                                                                              | ≥42              | 90.8 (81.5 to 95.5) |                     |       |                     |
|                                  |                                                                                                                                                              |                            |                |                             |                     |                | Moderna - mRNA-1273                     |                             |                     | Symptomatic disease               | 0-89                                                                         | 44.8 (16.0-63.8) | Moderna - mRNA-1273 | Symptomatic disease | 7-20  | 53.1 (40.7 to 62.8) |
|                                  |                                                                                                                                                              |                            |                |                             |                     |                |                                         |                             |                     |                                   | 90-179                                                                       | 20.8 (13.7-27.4) |                     |                     | 21-34 | 54.6 (41.1 to 65.0) |
|                                  |                                                                                                                                                              |                            | ≥180           | -9.3 (-16.3 to -2.8)        |                     |                | ≥35                                     | 38.6 (19.4 to 53.1)         |                     |                                   |                                                                              |                  |                     |                     |       |                     |
|                                  |                                                                                                                                                              |                            | Severe disease | 0-179                       | 76.9 (19.2-93.4)    |                |                                         |                             |                     |                                   |                                                                              |                  |                     |                     |       |                     |
|                                  |                                                                                                                                                              |                            |                | ≥180                        | 64.0 (39.1-78.7)    |                |                                         |                             |                     |                                   |                                                                              |                  |                     |                     |       |                     |
| Florentino <sup>5</sup> (Brazil) | Test-negative case control (age, gender, calendar time, geographic region, socioeconomic status, comorbidities, pregnancy and post-partum status, ethnicity) | Jan 1, 2022 - Mar 8, 2022  | 12-17 years    | Pfizer BioNTech - Comirnaty | Symptomatic disease | 14-27          | 62.8 (60.9-64.7)                        |                             |                     |                                   |                                                                              |                  |                     |                     |       |                     |
|                                  |                                                                                                                                                              |                            |                |                             |                     | 28-41          | 49.4 (4.4-51.3)                         |                             |                     |                                   |                                                                              |                  |                     |                     |       |                     |
|                                  |                                                                                                                                                              |                            |                |                             |                     | 42-55          | 37.4 (35.3-39.3)                        |                             |                     |                                   |                                                                              |                  |                     |                     |       |                     |
|                                  |                                                                                                                                                              |                            |                |                             |                     | 56-69          | 29.6 (27.5-31.7)                        |                             |                     |                                   |                                                                              |                  |                     |                     |       |                     |
|                                  |                                                                                                                                                              |                            |                |                             |                     | 70-83          | 21.7 (19.2-24.1)                        |                             |                     |                                   |                                                                              |                  |                     |                     |       |                     |
|                                  |                                                                                                                                                              |                            |                |                             |                     | 84-97          | 16.6 (13.7- 19.5)                       |                             |                     |                                   |                                                                              |                  |                     |                     |       |                     |
|                                  |                                                                                                                                                              |                            |                |                             |                     | 98-153         | 13.9 (10.9-16.9)                        |                             |                     |                                   |                                                                              |                  |                     |                     |       |                     |
|                                  |                                                                                                                                                              |                            |                |                             |                     | 14-27          | 78.3 (75.3-80.9)                        |                             |                     |                                   |                                                                              |                  |                     |                     |       |                     |
|                                  |                                                                                                                                                              |                            |                |                             |                     | 28-41          | 70.8 (66.6-74.5)                        |                             |                     |                                   |                                                                              |                  |                     |                     |       |                     |
|                                  |                                                                                                                                                              |                            |                |                             |                     | 42-55          | 57.8 (50.8-63.8)                        |                             |                     |                                   |                                                                              |                  |                     |                     |       |                     |
|                                  |                                                                                                                                                              |                            |                |                             |                     | 56-69          | 41.2 (28.8-51.4)                        |                             |                     |                                   |                                                                              |                  |                     |                     |       |                     |
|                                  |                                                                                                                                                              |                            |                |                             |                     | 70-83          | 32.8 (13.9-47.6)                        |                             |                     |                                   |                                                                              |                  |                     |                     |       |                     |
|                                  |                                                                                                                                                              |                            |                |                             |                     | 84-97          | 24.7 (-4.0-45.5)                        |                             |                     |                                   |                                                                              |                  |                     |                     |       |                     |
|                                  |                                                                                                                                                              |                            |                |                             |                     | 98-153         | 31.3 (4.8-50.5)                         |                             |                     |                                   |                                                                              |                  |                     |                     |       |                     |
|                                  |                                                                                                                                                              |                            |                |                             |                     |                | 14-27                                   |                             |                     |                                   |                                                                              | 75.4 (57.3-85.9) |                     |                     |       |                     |

|                                  |                                                                                                                                                                                 |                             |                    |                             |                      |         |                  |                             |                      |         |                  |
|----------------------------------|---------------------------------------------------------------------------------------------------------------------------------------------------------------------------------|-----------------------------|--------------------|-----------------------------|----------------------|---------|------------------|-----------------------------|----------------------|---------|------------------|
|                                  |                                                                                                                                                                                 |                             |                    |                             | Severe disease       | 28-41   | 82.1 (70.7-89.1) |                             |                      |         |                  |
|                                  |                                                                                                                                                                                 |                             |                    |                             |                      | 42-55   | 82.8 (74.5-88.5) |                             |                      |         |                  |
|                                  |                                                                                                                                                                                 |                             |                    |                             |                      | 56-69   | 81.2 (73.4-86.7) |                             |                      |         |                  |
|                                  |                                                                                                                                                                                 |                             |                    |                             |                      | 70-83   | 83.0 (75.1-88.4) |                             |                      |         |                  |
|                                  |                                                                                                                                                                                 |                             |                    |                             |                      | 84-97   | 89.8 (82.1-94.2) |                             |                      |         |                  |
|                                  |                                                                                                                                                                                 |                             |                    |                             |                      | 98-153  | 84.9 (75.2-90.8) |                             |                      |         |                  |
| Fowlkes <sup>6</sup> (USA)       | Prospective cohort (site, sociodemographic characteristics, comorbidities, influenza vaccination history, SARS-CoV-2 infection and vaccine knowledge, attitudes, and practices) | Jul 25, 2021 - Feb 12, 2022 | 12-15 years        | Pfizer BioNTech - Comirnaty | Documented infection | 14-149  | 59 (22-79)       |                             |                      |         |                  |
|                                  |                                                                                                                                                                                 |                             |                    |                             |                      | 150-202 | 62 (-28-89)      |                             |                      |         |                  |
| Gray <sup>7</sup> (South Africa) | Test-negative case-control (age, sex, number of documented risk factors, surveillance week, period of prior infection, geographic region)                                       | Nov 8, 2021 - Dec 17, 2021  | Healthcare workers | Janssen - Ad26.COV2.S       |                      |         |                  | Janssen - Ad26.COV2.S       | Severe disease       | 14-27   | 84 (67-92)       |
|                                  |                                                                                                                                                                                 |                             |                    |                             |                      |         |                  |                             |                      | 30-60   | 85 (54-95)       |
| Hansen <sup>8</sup> (Denmark)    | Retrospective cohort (age, sex, comorbidities, and region of residency)                                                                                                         | Dec 28, 2021 - Feb 15, 2022 | ≥12                | Pfizer BioNTech - Comirnaty | Documented infection | 14-30   | 37.0 (35.6-38.3) | Pfizer BioNTech - Comirnaty | Documented infection | 14-30   | 47.9 (47.4-48.3) |
|                                  |                                                                                                                                                                                 |                             |                    |                             |                      | 31-60   | 27.4 (26.3-28.4) |                             |                      | 31-60   | 41.0 (40.5-41.5) |
|                                  |                                                                                                                                                                                 |                             |                    |                             |                      | 61-90   | 26.6 (25.3-27.9) |                             |                      | 61-90   | 41.0 (40.3-41.7) |
|                                  |                                                                                                                                                                                 |                             |                    |                             |                      | 91-120  | 27.4 (26.2-28.5) |                             |                      | 91-120  | 38.6 (37.7-39.5) |
|                                  |                                                                                                                                                                                 |                             |                    |                             |                      | 120-210 | 9.8 (9.2-10.4)   |                             |                      | 120-140 | 40.5 (38.9-42.2) |
|                                  |                                                                                                                                                                                 |                             |                    |                             | Severe disease       | 14-30   | 50.5 (33.9-63.0) |                             | Severe disease       | 14-30   | 88.8 (87.3-90.1) |
|                                  |                                                                                                                                                                                 |                             |                    |                             |                      | 31-60   | 48.5 (36.6-58.2) |                             |                      | 31-60   | 88.5 (87.4-89.6) |
|                                  |                                                                                                                                                                                 |                             |                    |                             |                      | 61-90   | 42.6 (26.9-54.9) |                             |                      | 61-90   | 84.9 (83.1-86.5) |
|                                  |                                                                                                                                                                                 |                             |                    |                             |                      | 91-120  | 47.2 (33.7-57.9) |                             |                      | 91-120  | 79.0 (76.5-81.3) |
|                                  |                                                                                                                                                                                 |                             |                    |                             |                      | 120-210 | 51.6 (47.2-55.6) |                             |                      | 120-140 | 66.2 (61.1-70.7) |
|                                  |                                                                                                                                                                                 |                             |                    | Moderna - mRNA-1273         | Documented infection | 14-30   | 37.9 (34.4-41.2) | Moderna - mRNA-1273         | Documented infection | 14-30   | 47.7 (47.0-48.3) |
|                                  |                                                                                                                                                                                 |                             |                    |                             |                      | 31-60   | 27.1 (24.5-29.6) |                             |                      | 31-60   | 45.5 (44.9-46.2) |
|                                  |                                                                                                                                                                                 |                             |                    |                             |                      | 61-90   | 26.8 (23.8-29.6) |                             |                      | 61-90   | 43.5 (42.2-44.7) |
|                                  |                                                                                                                                                                                 |                             |                    |                             |                      | 91-120  | 23.3 (21.1-25.5) |                             |                      | 91-120  | 36.9 (34.8-38.9) |

|                                        |                                                                                                                                                                                                   |                             |             |                             |                      |         |                  |                             |                      |         |                  |
|----------------------------------------|---------------------------------------------------------------------------------------------------------------------------------------------------------------------------------------------------|-----------------------------|-------------|-----------------------------|----------------------|---------|------------------|-----------------------------|----------------------|---------|------------------|
|                                        |                                                                                                                                                                                                   |                             |             |                             |                      | 120-210 | 13·2 (12·3-14·2) |                             |                      | 120-126 | 37·9 (33·4-42·0) |
|                                        |                                                                                                                                                                                                   |                             |             |                             |                      |         |                  |                             | Severe disease       | 14-30   | 90·2 (87·3-92·5) |
|                                        |                                                                                                                                                                                                   |                             |             |                             |                      |         |                  |                             |                      | 31-60   | 87·7 (85·3-89·7) |
|                                        |                                                                                                                                                                                                   |                             |             |                             |                      |         |                  |                             |                      | 61-90   | 87·8 (84·5-90·4) |
|                                        |                                                                                                                                                                                                   |                             |             |                             |                      |         |                  |                             |                      | 91-120  | 83·6 (77·7-88·0) |
|                                        |                                                                                                                                                                                                   |                             |             |                             |                      |         |                  |                             |                      | 120-126 | 77·3 (63·1-86·1) |
| Klein <sup>9</sup><br>(USA)            | Test-negative case-control<br>(age, geographic region, calendar time, local virus circulation in the community, and weighted for inverse propensity to be vaccinated or unvaccinated)             | Dec 16, 2021 - Jan 9, 2022  | 12-15 years | Pfizer BioNTech - Comirnaty | Symptomatic disease  | 14-149  | 45 (30-57)       |                             |                      |         |                  |
|                                        |                                                                                                                                                                                                   |                             | 16-17 years |                             |                      | 150-241 | -2 (-25-17)      |                             |                      |         |                  |
|                                        |                                                                                                                                                                                                   |                             |             |                             |                      | 14-149  | 34 (8-53)        |                             |                      |         |                  |
|                                        |                                                                                                                                                                                                   |                             |             |                             |                      | 150-241 | -3 (-30-18)      |                             |                      |         |                  |
| Powell <sup>10</sup><br>(UK)           | Test-negative case control<br>(age, sex, index of multiple deprivation, ethnic group, geographic region, calendar week, clinical risk group, clinically extremely vulnerable, previous infection) | Sep 13, 2021 - Jan 12, 2022 | 16-17 years | Pfizer BioNTech - Comirnaty | Symptomatic disease  | 14-34   | 71·3 (69·3-73·1) |                             |                      |         |                  |
|                                        |                                                                                                                                                                                                   |                             |             |                             |                      | 35-69   | 49·5 (45·7-53·0) |                             |                      |         |                  |
|                                        |                                                                                                                                                                                                   |                             |             |                             |                      | ≥70     | 22·6 (14·5-29·9) |                             |                      |         |                  |
| Price <sup>11</sup><br>(United States) | Test-negative case control (U.S. Census region, calendar time of admission (biweekly intervals), age, sex, and race and ethnic group)                                                             | Dec 19, 2021 - Feb 17, 2022 | 12-18 years | Pfizer BioNTech - Comirnaty | Severe disease       | 14-160  | 43 (-1·0- 68·0)  |                             |                      |         |                  |
|                                        |                                                                                                                                                                                                   |                             |             |                             |                      | 161-314 | 38 (-3·0- 62·0)  |                             |                      |         |                  |
| Šmíd <sup>12</sup><br>(Czech Republic) | Retrospective cohort (age group, sex and prior infection)                                                                                                                                         | Dec 7, 2021 - Feb 13, 2022  | ≥5 years    | Pfizer BioNTech - Comirnaty | Documented infection | 14-74   | 49 (48-50)       | Pfizer BioNTech - Comirnaty | Documented infection | 14-74   | 58 (58-59)       |
|                                        |                                                                                                                                                                                                   |                             |             |                             |                      | 75-135  | 27 (25-29)       |                             |                      | 75-243  | 24 (22-26)       |
|                                        |                                                                                                                                                                                                   |                             |             |                             |                      | >135    | 11 (10-12)       |                             |                      |         |                  |
|                                        |                                                                                                                                                                                                   |                             |             |                             | Severe disease       | 14-74   | 46 (28-60)       |                             | Severe disease       | 14-74   | 86 (84-89)       |
|                                        |                                                                                                                                                                                                   |                             |             |                             |                      | 75-135  | -10 (-51-19)     |                             |                      | 75-243  | 79 (74-82)       |
|                                        |                                                                                                                                                                                                   |                             |             |                             |                      | >135    | 34 (24-42)       |                             |                      |         |                  |

|                                |                                                                                                                                                                                                                                                                                                           |                             |             |                             |                      |                                        |                                                                              |                             |                      |                                             |                                                                                                  |
|--------------------------------|-----------------------------------------------------------------------------------------------------------------------------------------------------------------------------------------------------------------------------------------------------------------------------------------------------------|-----------------------------|-------------|-----------------------------|----------------------|----------------------------------------|------------------------------------------------------------------------------|-----------------------------|----------------------|---------------------------------------------|--------------------------------------------------------------------------------------------------|
|                                |                                                                                                                                                                                                                                                                                                           |                             |             | Moderna - mRNA-1273         | Documented infection | 14-74<br>75-135<br>>135                | 48 (44-52)<br>41 (36-46)<br>20 (17-22)                                       | Moderna - mRNA-1273         | Documented infection | 14-74<br>75-243                             | 61 (60-62)<br>33 (29-38)                                                                         |
|                                |                                                                                                                                                                                                                                                                                                           |                             |             |                             | Severe disease       | 14-74<br>75-135<br>>135                | 51 (-20-80)<br>39 (-92-81)<br>31 (9-49)                                      |                             | Severe disease       | 14-74<br>75-243                             | 89 (84-93)<br>84 (72-91)                                                                         |
|                                |                                                                                                                                                                                                                                                                                                           |                             |             | Janssen – Ad26.COV2.S       | Documented infection | 14-74<br>75-135<br>135+                | 47 (45-49)<br>37 (35-40)<br>35 (33-38)                                       |                             |                      |                                             |                                                                                                  |
|                                |                                                                                                                                                                                                                                                                                                           |                             |             |                             | Severe disease       | 14-74<br>75-135<br>>135                | 28 (-22-57)<br>40 (-8-66)<br>38 (8-58)                                       |                             |                      |                                             |                                                                                                  |
|                                |                                                                                                                                                                                                                                                                                                           |                             |             | AstraZeneca - Vaxzevria     | Documented infection | 75-135<br>>135                         | 51 (23-69)<br>5 (1-9)                                                        |                             |                      |                                             |                                                                                                  |
|                                |                                                                                                                                                                                                                                                                                                           |                             |             |                             | Severe disease       | 75-135<br>>135                         | -139 (-861-41)<br>13 (-8-30)                                                 |                             |                      |                                             |                                                                                                  |
| Ranzani <sup>13</sup> (Brazil) | Test-negative case control (age, comorbidities, race, prior symptomatic illness)                                                                                                                                                                                                                          | Sep 6, 2021 - Mar 10, 2022  | ≥18 years   | Sinovac-CoronaVac           | Symptomatic disease  | 14-59<br>60-179<br>180-396             | 26.9 (25.1-28.6)<br>5.0 (4.2-5.9)<br>8.1 (7.0-9.1)                           | Sinovac-CoronaVac           | Symptomatic disease  | 8-59<br>60-171                              | 15.0 (12.0-18.0)<br>0.4 (-2.2-2.9)                                                               |
|                                |                                                                                                                                                                                                                                                                                                           |                             |             |                             | Severe disease       | 14-59<br>60-179<br>180-396             | 49.9 (30.7-63.7)<br>62.6 (58.5-66.3)<br>57.0 (53.5-60.2)                     | Pfizer BioNTech - Comirnaty | Severe disease       | 8-59<br>60-171                              | 71.3 (60.3-79.2)<br>65.4 (61.5-68.8)                                                             |
|                                |                                                                                                                                                                                                                                                                                                           |                             |             |                             |                      |                                        |                                                                              |                             | Symptomatic disease  | 8-59<br>60-171                              | 56.8 (56.3-57.4)<br>34.9 (34.3-35.6)                                                             |
|                                |                                                                                                                                                                                                                                                                                                           |                             |             |                             |                      |                                        |                                                                              |                             | Severe disease       | 8-59<br>60-171                              | 85.5 (83.8-87.0)<br>86.1 (85.0-87.1)                                                             |
| Stowe <sup>14</sup> (UK)       | Test-negative case control (age, sex, index of multiple deprivation, ethnic group, care home residence status, geographic region, calendar time, health and social care worker status, clinical risk group, clinically extremely vulnerable, severely immunocompromised, and previously testing positive) | Nov 01, 2021 - Jan 01, 2022 | 18-64 years | Pfizer BioNTech - Comirnaty | Severe disease       | 14-174<br>175-373<br>14-174<br>175-290 | 73.8 (62.5-81.7)<br>65.1 (51.3-74.9)<br>87.6 (79.4-92.5)<br>65.4 (56.6-72.5) | Pfizer BioNTech - Comirnaty | Severe disease       | 7-13<br>14-34<br>35-69<br>70-178<br>105-178 | 85.2 (47.1-95.8)<br>79.7 (66.3-87.7)<br>86.6 (81.3-90.4)<br>79.3 (71.3-85.0)<br>66.0 (44.5-79.2) |
|                                |                                                                                                                                                                                                                                                                                                           |                             | ≥65 years   |                             |                      |                                        |                                                                              | Moderna - mRNA-1273         |                      | 14-34<br>35-69                              | 94.3 (85.0-97.8)<br>89.8 (77.9-95.3)                                                             |
|                                |                                                                                                                                                                                                                                                                                                           |                             |             |                             |                      |                                        |                                                                              | Pfizer BioNTech - Comirnaty |                      | 7-13<br>14-34<br>35-69<br>70-185<br>105-185 | 86.4 (69.1-94.0)<br>90.0 (85.4-93.2)<br>88.4 (85.7-90.6)<br>88.4 (86.2-90.2)<br>85.2 (82.1-87.7) |
|                                |                                                                                                                                                                                                                                                                                                           |                             |             |                             |                      |                                        |                                                                              | Moderna - mRNA-1273         |                      | 7-13<br>14-34<br>35-69<br>70-185            | 92.9 (50.2-99.0)<br>92.9 (83.0-97.1)<br>90.9 (84.8-94.5)<br>97.3 (90.8-99.2)                     |

|                                       |                                                                                                                                                                                 |                              |             |                             |                      |              |                  |                             |                      |                |                  |                  |                             |  |         |                  |
|---------------------------------------|---------------------------------------------------------------------------------------------------------------------------------------------------------------------------------|------------------------------|-------------|-----------------------------|----------------------|--------------|------------------|-----------------------------|----------------------|----------------|------------------|------------------|-----------------------------|--|---------|------------------|
|                                       |                                                                                                                                                                                 |                              | 18-64 years | AstraZeneca - Vaxzevria     |                      | 14-174       | 59.0 (31.9-75.3) | Pfizer BioNTech - Comirnaty |                      | 7-13           | 90.2 (78.1-95.6) |                  |                             |  |         |                  |
|                                       |                                                                                                                                                                                 |                              |             |                             |                      | 175-373      | 53.0 (41.7-62.0) |                             |                      |                | 14-34            | 88.9 (83.8-92.4) |                             |  |         |                  |
|                                       |                                                                                                                                                                                 |                              |             |                             |                      | 14-174       | 71.2 (50.0-83.4) |                             |                      |                | 35-69            | 83.9 (79.1-87.5) |                             |  |         |                  |
|                                       |                                                                                                                                                                                 |                              |             |                             |                      | 175-290      | 53.1 (43.4-61.2) |                             |                      |                | 70-178           | 82.2 (76.3-86.7) |                             |  |         |                  |
|                                       |                                                                                                                                                                                 |                              | ≥65 years   |                             |                      |              |                  | Moderna - mRNA-1273         |                      | 105-178        | 69.0 (50.3-80.7) |                  |                             |  |         |                  |
|                                       |                                                                                                                                                                                 |                              |             |                             |                      |              |                  |                             |                      |                |                  |                  |                             |  | 7-13    | 97.2 (86.1-99.4) |
|                                       |                                                                                                                                                                                 |                              |             |                             |                      |              |                  |                             |                      |                |                  |                  |                             |  | 14-34   | 93.0 (86.4-96.4) |
|                                       |                                                                                                                                                                                 |                              |             |                             |                      |              |                  |                             |                      |                |                  |                  |                             |  | 35-69   | 89.2 (87.1-91.0) |
|                                       |                                                                                                                                                                                 |                              |             |                             |                      |              |                  |                             |                      |                |                  |                  | Pfizer BioNTech - Comirnaty |  | 7-13    | 85.4 (73.4-92.0) |
|                                       |                                                                                                                                                                                 |                              |             |                             |                      |              |                  |                             |                      |                |                  |                  |                             |  | 14-34   | 91.3 (88.5-93.5) |
|                                       |                                                                                                                                                                                 |                              |             |                             |                      |              |                  |                             |                      |                |                  |                  |                             |  | 35-69   | 89.2 (87.1-91.0) |
|                                       |                                                                                                                                                                                 |                              |             |                             |                      |              |                  |                             |                      |                |                  |                  |                             |  | 70-178  | 87.6 (85.2-89.6) |
|                                       |                                                                                                                                                                                 |                              |             |                             |                      |              |                  |                             |                      |                |                  |                  | Moderna - mRNA-1273         |  | 105-178 | 86.1 (82.5-88.9) |
|                                       |                                                                                                                                                                                 |                              |             |                             |                      |              |                  |                             |                      |                |                  |                  |                             |  | 14-34   | 92.9 (87.7-95.9) |
|                                       |                                                                                                                                                                                 |                              |             |                             |                      |              |                  |                             |                      |                |                  |                  |                             |  | 35-69   | 92.7 (89.1-95.2) |
|                                       |                                                                                                                                                                                 |                              |             |                             |                      |              |                  |                             |                      |                |                  |                  |                             |  | 70-185  | 91.8 (85.9-95.3) |
| Tartof <sup>15</sup> (USA)†           | Test-negative case control (age, sex, race/ethnicity, body mass index, comorbidities, prior infection)                                                                          | Dec 1, 2021 - Jan 11, 2022   | ≥18 years   | Pfizer BioNTech - Comirnaty | Symptomatic disease  | 7-89         | 64 (51-73)       | Pfizer BioNTech - Comirnaty | Symptomatic disease  | 14-89          | 77 (72-81)       |                  |                             |  |         |                  |
|                                       |                                                                                                                                                                                 |                              |             |                             |                      | 90-179       | 47 (34-57)       |                             |                      |                | ≥ 90             | 53 (36-66)       |                             |  |         |                  |
|                                       |                                                                                                                                                                                 |                              |             |                             |                      | 180-269      | 51 (43-59)       |                             |                      |                |                  |                  |                             |  |         |                  |
|                                       |                                                                                                                                                                                 |                              |             |                             |                      | ≥270         | 31 (16-43)       |                             |                      |                |                  |                  |                             |  |         |                  |
|                                       |                                                                                                                                                                                 |                              |             |                             | Severe disease       | 7-89         | 68 (48-80)       |                             |                      | Severe disease | 14-89            | 85 (80-89)       |                             |  |         |                  |
|                                       |                                                                                                                                                                                 |                              |             |                             |                      | 90-179       | 68 (53-78)       |                             |                      |                |                  | ≥ 90             | 55 (28-71)                  |  |         |                  |
|                                       |                                                                                                                                                                                 |                              |             |                             |                      | 180-269      | 72 (63-79)       |                             |                      |                |                  |                  |                             |  |         |                  |
|                                       |                                                                                                                                                                                 |                              |             |                             |                      | ≥270         | 41 (21-55)       |                             |                      |                |                  |                  |                             |  |         |                  |
| Tseng <sup>16</sup> (USA)             | Test-negative case control (age group, sex, race/ethnicity, comorbidities, frailty index, prior infection, number of healthcare encounters, specimen type, medical center area) | Dec 6, 2021 - Dec 31 2021    | ≥18 years   | Moderna - mRNA-1273         | Documented infection | 14-90 days   | 44.0 (35.1-51.6) | Moderna - mRNA-1273         | Documented infection | 14-60          | 72.1 (70.2-73.9) |                  |                             |  |         |                  |
|                                       |                                                                                                                                                                                 |                              |             |                             |                      | 91-180 days  | 23.5 (16.4-30.0) |                             |                      |                | >60              | 51.2 (44.2-57.3) |                             |  |         |                  |
|                                       |                                                                                                                                                                                 |                              |             |                             |                      | 181-270 days | 13.8 (10.2-17.3) |                             |                      |                |                  |                  |                             |  |         |                  |
|                                       |                                                                                                                                                                                 |                              |             |                             |                      | >270 days    | 5.9 (0.4-11.0)   |                             |                      |                |                  |                  |                             |  |         |                  |
|                                       |                                                                                                                                                                                 |                              |             |                             |                      |              |                  |                             |                      |                |                  |                  |                             |  |         |                  |
| UKHSA/ Andrews <sup>17,18</sup> (UK)‡ | Test-negative case control (age group, sex, index of multiple deprivations (quintile), ethnic                                                                                   | Nov 27, 2021 - Jan 23, 2022. | ≥18 years   | Pfizer BioNTech - Comirnaty | Symptomatic disease  | 14-34        | 65.8 (64.4-67.2) | Pfizer BioNTech - Comirnaty | Symptomatic disease  | 14-34          | 67.6 (67.0-68.2) |                  |                             |  |         |                  |
|                                       |                                                                                                                                                                                 |                              |             |                             |                      | 35-69        | 49.1 (47.7-50.6) |                             |                      |                | 35-69            | 55.9 (55.1-56.6) |                             |  |         |                  |
|                                       |                                                                                                                                                                                 |                              |             |                             |                      | 70-104       | 31.0 (29.6-32.3) |                             |                      |                | 70-104           | 46.2 (45.2-47.1) |                             |  |         |                  |
|                                       |                                                                                                                                                                                 |                              |             |                             |                      | 105-139      | 16.5 (15.3-17.6) |                             |                      |                | 105-139          | 39.5 (36.0-42.8) |                             |  |         |                  |
|                                       |                                                                                                                                                                                 |                              |             |                             |                      | 140-174      | 13.3 (12.0-14.7) |                             |                      |                |                  |                  |                             |  |         |                  |
|                                       |                                                                                                                                                                                 |                              |             |                             |                      | ≥175         | 9.4 (7.8-11.1)   |                             |                      |                |                  |                  |                             |  |         |                  |
|                                       |                                                                                                                                                                                 |                              |             |                             |                      |              |                  |                             |                      |                |                  |                  |                             |  |         |                  |

|                               |                                                                                                                                                                                     |                             |                     |                             |                      |       |                  |  |  |  |  |  |  |  |  |  |  |                         |                     |         |                  |                             |                     |        |                  |
|-------------------------------|-------------------------------------------------------------------------------------------------------------------------------------------------------------------------------------|-----------------------------|---------------------|-----------------------------|----------------------|-------|------------------|--|--|--|--|--|--|--|--|--|--|-------------------------|---------------------|---------|------------------|-----------------------------|---------------------|--------|------------------|
|                               | group, geographic region, period (day of test), health and social care worker status, clinical risk group status, clinically extremely vulnerable, and previously testing positive) |                             |                     |                             |                      |       |                  |  |  |  |  |  |  |  |  |  |  | Moderna - mRNA-1273     | Symptomatic disease | 14-34   | 73.9 (73.2-74.5) |                             |                     |        |                  |
|                               |                                                                                                                                                                                     |                             |                     |                             |                      |       |                  |  |  |  |  |  |  |  |  |  |  |                         |                     | 35-69   | 65.4 (63.9-66.9) |                             |                     |        |                  |
|                               |                                                                                                                                                                                     |                             |                     |                             |                      |       |                  |  |  |  |  |  |  |  |  |  |  |                         |                     | 70-104  | 64.1 (49.7-74.4) |                             |                     |        |                  |
|                               |                                                                                                                                                                                     |                             |                     |                             |                      |       |                  |  |  |  |  |  |  |  |  |  |  | AstraZeneca - Vaxzevria | Symptomatic disease | 14-34   | 49.8 (40.7-57.5) | Pfizer BioNTech - Comirnaty | Symptomatic disease | 14-34  | 63.2 (62.6-63.8) |
|                               |                                                                                                                                                                                     |                             |                     |                             |                      |       |                  |  |  |  |  |  |  |  |  |  |  |                         |                     | 35-69   | 35.7 (27.7-42.8) |                             |                     | 35-69  | 54.0 (53.3-54.8) |
|                               |                                                                                                                                                                                     |                             |                     |                             |                      |       |                  |  |  |  |  |  |  |  |  |  |  |                         |                     | 70-104  | 30.4 (23.2-36.9) |                             |                     | 70-104 | 39.3 (37.9-40.8) |
|                               |                                                                                                                                                                                     |                             |                     |                             |                      |       |                  |  |  |  |  |  |  |  |  |  |  |                         |                     | 105-139 | 18.8 (14.6-22.9) |                             |                     | ≥105   | 29.4 (19.5-38.2) |
|                               |                                                                                                                                                                                     |                             |                     |                             |                      |       |                  |  |  |  |  |  |  |  |  |  |  |                         |                     | 140-174 | 6.1 (4.1-8.1)    |                             |                     |        |                  |
|                               |                                                                                                                                                                                     |                             |                     |                             |                      |       |                  |  |  |  |  |  |  |  |  |  |  |                         |                     | ≥175    | -1.0 (-2.4-0.3)  |                             |                     |        |                  |
|                               |                                                                                                                                                                                     |                             |                     |                             |                      |       |                  |  |  |  |  |  |  |  |  |  |  | Moderna - mRNA-1273     | Symptomatic disease | 14-34   | 76 (72-79)       | Moderna - mRNA-1273         | Symptomatic disease | 14-34  | 70.7 (70.1-71.2) |
|                               |                                                                                                                                                                                     |                             |                     |                             |                      |       |                  |  |  |  |  |  |  |  |  |  |  |                         |                     | 35-69   | 54 (49-58)       |                             |                     | 35-69  | 62.1 (61.1-63.1) |
|                               |                                                                                                                                                                                     |                             |                     |                             |                      |       |                  |  |  |  |  |  |  |  |  |  |  |                         |                     | 70-104  | 36 (33-39)       |                             |                     | 70-104 | 38.9 (18.8-54.1) |
|                               |                                                                                                                                                                                     |                             |                     |                             |                      |       |                  |  |  |  |  |  |  |  |  |  |  | Moderna - mRNA-1273     | Symptomatic disease | 14-34   | 76 (72-79)       | Moderna - mRNA-1273         | Symptomatic disease | 14-34  | 68 (66-70)       |
|                               |                                                                                                                                                                                     |                             |                     |                             |                      |       |                  |  |  |  |  |  |  |  |  |  |  |                         |                     | 35-69   | 54 (49-58)       |                             |                     | 35-69  | 57 (35-71)       |
| 70-104                        | 36 (33-39)                                                                                                                                                                          | Pfizer BioNTech - Comirnaty | Symptomatic disease | 14-34                       | 66 (64-68)           |       |                  |  |  |  |  |  |  |  |  |  |  |                         |                     |         |                  |                             |                     |        |                  |
| 105-139                       | 26 (24-28)                                                                                                                                                                          |                             |                     | 35-69                       | 49 (29-64)           |       |                  |  |  |  |  |  |  |  |  |  |  |                         |                     |         |                  |                             |                     |        |                  |
| 140-174                       | 17 (14-20)                                                                                                                                                                          |                             |                     |                             |                      |       |                  |  |  |  |  |  |  |  |  |  |  |                         |                     |         |                  |                             |                     |        |                  |
| ≥175                          | 13 (3-22)                                                                                                                                                                           |                             |                     |                             |                      |       |                  |  |  |  |  |  |  |  |  |  |  |                         |                     |         |                  |                             |                     |        |                  |
| Veneti (Norway) <sup>19</sup> | Retrospective cohort (sex, country of birth, county of residence, crowding and underlying comorbidities associated with increased risk of severe COVID-19)                          | Aug 25, 2021 - Jan 16, 2022 | 16-17 years         | Pfizer BioNTech - Comirnaty | Documented infection | 7-34  | 53.1 (42.6-61.7) |  |  |  |  |  |  |  |  |  |  |                         |                     |         |                  |                             |                     |        |                  |
|                               |                                                                                                                                                                                     |                             |                     |                             |                      | 35-62 | 45.7 (34.8-54.7) |  |  |  |  |  |  |  |  |  |  |                         |                     |         |                  |                             |                     |        |                  |
|                               |                                                                                                                                                                                     |                             |                     |                             |                      | 63-91 | 23.3 (2.7-39.5)  |  |  |  |  |  |  |  |  |  |  |                         |                     |         |                  |                             |                     |        |                  |
|                               |                                                                                                                                                                                     |                             |                     |                             |                      |       |                  |  |  |  |  |  |  |  |  |  |  |                         |                     |         |                  |                             |                     |        |                  |

\*See section S13 for definitions of symptomatic disease and severe disease for each study.

†Publication date is after cutoff date for literature search; study is included because it replaces and provides updated estimates from an earlier preprint that had originally been included in the analysis.

‡Study provides estimates for severe disease; however, these estimates are not included here since a later publication (Stowe *et al*) provides estimates for severe disease for the same population.

**S5: Characteristics and results of studies excluded at Step 2 due to combining vaccines for VE estimates against Omicron\***

| Study (Country)                | Study Design (Variables controlled for in VE estimates)                                                                                                                                                                                                                                                                                                                                                                     | Testing Period              | Age group (years) | PRIMARY SERIES                                     |                                             |                                       |                                | BOOSTER                                            |                                             |                                       |                                |            |
|--------------------------------|-----------------------------------------------------------------------------------------------------------------------------------------------------------------------------------------------------------------------------------------------------------------------------------------------------------------------------------------------------------------------------------------------------------------------------|-----------------------------|-------------------|----------------------------------------------------|---------------------------------------------|---------------------------------------|--------------------------------|----------------------------------------------------|---------------------------------------------|---------------------------------------|--------------------------------|------------|
|                                |                                                                                                                                                                                                                                                                                                                                                                                                                             |                             |                   | Vaccine                                            | Disease Outcome                             | Time interval since final dose (days) | Vaccine effectiveness (95% CI) | Vaccine                                            | Disease Outcome                             | Time interval since final dose (days) | Vaccine effectiveness (95% CI) |            |
| Buchan <sup>20</sup> (Canada)  | Test negative case control (10-year age groups, sex, geographic region, number of SARS-CoV-2 PCR tests, prior infection, comorbidities, influenza vaccination, and neighborhood-level information on median household income, proportion of the working population employed as non-health essential workers, mean number of persons per dwelling, and proportion of the population who self-identify as a visible minority) | Dec 6, 2021 - Dec 26, 2021  | ≥18 years         | Pfizer BioNTech - Comirnaty or Moderna - mRNA-1273 | Symptomatic disease                         | 7-59                                  | 36 (24- 45)                    |                                                    |                                             |                                       |                                |            |
|                                |                                                                                                                                                                                                                                                                                                                                                                                                                             |                             |                   |                                                    |                                             | 60-119                                | 12 (3-21)                      |                                                    |                                             |                                       |                                |            |
|                                |                                                                                                                                                                                                                                                                                                                                                                                                                             |                             |                   |                                                    |                                             | 120-179                               | 15 (8-22)                      |                                                    |                                             |                                       |                                |            |
|                                |                                                                                                                                                                                                                                                                                                                                                                                                                             |                             |                   |                                                    |                                             | 180-239                               | 1 (-8-10)                      |                                                    |                                             |                                       |                                |            |
|                                |                                                                                                                                                                                                                                                                                                                                                                                                                             |                             |                   |                                                    |                                             | ≥240                                  | 2 (-17-17)                     |                                                    |                                             |                                       |                                |            |
|                                |                                                                                                                                                                                                                                                                                                                                                                                                                             |                             |                   |                                                    | Hospitalization                             | 7-59                                  | 55 (-106- 90)                  |                                                    |                                             |                                       |                                |            |
|                                |                                                                                                                                                                                                                                                                                                                                                                                                                             |                             |                   |                                                    |                                             | 60-119                                | 37 (-71-77)                    |                                                    |                                             |                                       |                                |            |
|                                |                                                                                                                                                                                                                                                                                                                                                                                                                             |                             |                   |                                                    |                                             | 120-179                               | 75 (51- 87)                    |                                                    |                                             |                                       |                                |            |
| 180-239                        | 82 (62-91)                                                                                                                                                                                                                                                                                                                                                                                                                  |                             |                   |                                                    |                                             |                                       |                                |                                                    |                                             |                                       |                                |            |
|                                | ≥240                                                                                                                                                                                                                                                                                                                                                                                                                        | 86 (-12-98)                 |                   |                                                    |                                             |                                       |                                |                                                    |                                             |                                       |                                |            |
| Ferdinands <sup>21</sup> (USA) | Test negative case control (calendar time, geographic area, age, local virus circulation, propensity to be vaccinated, other factors)                                                                                                                                                                                                                                                                                       | Dec 16, 2021 – Jan 22, 2022 | ≥18 years         | Pfizer BioNTech - Comirnaty or Moderna - mRNA-1273 | Emergency department and urgent care visits | <60                                   | 69 (62-75)                     | Pfizer BioNTech - Comirnaty or Moderna - mRNA-1273 | Emergency department and urgent care visits | <60                                   | 87 (85-88)                     |            |
|                                |                                                                                                                                                                                                                                                                                                                                                                                                                             |                             |                   |                                                    |                                             | 60-119                                | 50 (45-55)                     |                                                    |                                             | 60-119                                | 81 (79-82)                     |            |
|                                |                                                                                                                                                                                                                                                                                                                                                                                                                             |                             |                   |                                                    |                                             | 120-149                               | 48 (41-54)                     |                                                    |                                             | 120-149                               | 66 (59-71)                     |            |
|                                |                                                                                                                                                                                                                                                                                                                                                                                                                             |                             |                   |                                                    |                                             | ≥150                                  | 37 (34-40)                     |                                                    |                                             | ≥150                                  | 31 (-50-68)                    |            |
|                                |                                                                                                                                                                                                                                                                                                                                                                                                                             |                             |                   |                                                    | Hospitalization                             | <60                                   | 71 (51-83)                     |                                                    |                                             | Hospitalization                       | <60                            | 91 (88-93) |
|                                |                                                                                                                                                                                                                                                                                                                                                                                                                             |                             |                   |                                                    |                                             | 60-119                                | 65 (53-74)                     |                                                    |                                             |                                       | 60-119                         | 88 (85-90) |
|                                |                                                                                                                                                                                                                                                                                                                                                                                                                             |                             |                   |                                                    |                                             | 120-149                               | 58 (38-71)                     |                                                    |                                             |                                       | ≥120                           | 78 (67-85) |
|                                |                                                                                                                                                                                                                                                                                                                                                                                                                             |                             |                   |                                                    |                                             | ≥150                                  | 54 (48-59)                     |                                                    |                                             |                                       |                                |            |
| Gram <sup>22</sup> (Denmark)   | Retrospective cohort (five-year age groups, sex, and geographical region)                                                                                                                                                                                                                                                                                                                                                   | Dec 21, 2021 - Jan 31, 2022 | 18-59 years       | Pfizer BioNTech - Comirnaty or Moderna - mRNA-1273 | Any infection                               | 14-30                                 | 39.8 (38.4-41.2)               | Pfizer BioNTech - Comirnaty or                     | Any infection                               | 14-30                                 | 55.2 (54.7-55.6)               |            |
|                                |                                                                                                                                                                                                                                                                                                                                                                                                                             |                             |                   |                                                    |                                             | 31-60                                 | 31.6 (30.5-32.8)               |                                                    |                                             | 31-60                                 | 50.8 (50.2-51.4)               |            |
|                                |                                                                                                                                                                                                                                                                                                                                                                                                                             |                             |                   |                                                    |                                             | 61-90                                 | 32.1 (30.6-33.5)               |                                                    |                                             | 61-90                                 | 52.9 (52.0-53.7)               |            |
|                                |                                                                                                                                                                                                                                                                                                                                                                                                                             |                             |                   |                                                    |                                             | 91-120                                | 31.4 (30.3-32.4)               |                                                    |                                             | 91-120                                | 51.1 (49.7-52.5)               |            |
|                                |                                                                                                                                                                                                                                                                                                                                                                                                                             |                             |                   |                                                    |                                             |                                       |                                |                                                    |                                             |                                       |                                |            |



|                               |                                                                                                                                                                                                              |                             |                                               |                                                    |                         |        |                  |                                                    |                         |        |                  |
|-------------------------------|--------------------------------------------------------------------------------------------------------------------------------------------------------------------------------------------------------------|-----------------------------|-----------------------------------------------|----------------------------------------------------|-------------------------|--------|------------------|----------------------------------------------------|-------------------------|--------|------------------|
|                               |                                                                                                                                                                                                              |                             |                                               |                                                    |                         | ≥120   | 13.2 (12.5-13.9) | Moderna - mRNA-1273                                |                         | ≥120   | 49.9 (46.5-53.1) |
|                               |                                                                                                                                                                                                              |                             |                                               |                                                    | Hospitalization         | 14-30  | 62.4 (46.3-73.6) |                                                    | Hospitalization         | 14-30  | 89.8 (87.9-91.3) |
|                               |                                                                                                                                                                                                              |                             |                                               |                                                    |                         | 31-60  | 51.4 (37.4-62.3) |                                                    |                         | 31-60  | 87.4 (84.9-89.6) |
|                               |                                                                                                                                                                                                              |                             |                                               |                                                    |                         | 61-90  | 59.8 (43.7-71.3) |                                                    |                         | 61-90  | 80.5 (75.4-84.5) |
|                               |                                                                                                                                                                                                              |                             |                                               |                                                    |                         | 91-120 | 61.4 (51.3-69.4) |                                                    |                         | 91-120 | 72.8 (63.6-79.7) |
|                               |                                                                                                                                                                                                              |                             |                                               |                                                    |                         | ≥120   | 65.9 (62.0-69.4) |                                                    |                         | ≥120   | 33.3 (0.9-55.1)  |
|                               |                                                                                                                                                                                                              |                             | ≥60 years                                     |                                                    | Any infection           | 14-30  | 39.9 (26.4-50.9) |                                                    | Any infection           | 14-30  | 57.6 (55.8-59.4) |
|                               |                                                                                                                                                                                                              |                             |                                               |                                                    |                         | 31-60  | 39.2 (27.8-48.8) |                                                    |                         | 31-60  | 55.3 (53.6-56.9) |
|                               |                                                                                                                                                                                                              |                             |                                               |                                                    |                         | 61-90  | 26.4 (10.4-39.6) |                                                    |                         | 61-90  | 58.3 (56.5-60.0) |
|                               |                                                                                                                                                                                                              |                             |                                               |                                                    |                         | 91-120 | 24.4 (11.9-35.1) |                                                    |                         | 91-120 | 56.6 (54.4-58.7) |
|                               |                                                                                                                                                                                                              |                             |                                               |                                                    |                         | ≥120   | 4.7 (0.2-8.9)    |                                                    |                         | ≥120   | 52.8 (49.3-56.0) |
|                               |                                                                                                                                                                                                              |                             |                                               |                                                    |                         |        |                  |                                                    | Hospitalization         | 14-30  | 94.4 (93.0-95.5) |
|                               |                                                                                                                                                                                                              |                             |                                               |                                                    |                         |        |                  |                                                    |                         | 31-60  | 93.8 (92.7-94.7) |
|                               |                                                                                                                                                                                                              |                             |                                               |                                                    |                         |        |                  |                                                    |                         | 61-90  | 91.7 (90.2-93.0) |
|                               |                                                                                                                                                                                                              |                             |                                               |                                                    |                         |        |                  |                                                    |                         | 91-120 | 84.5 (81.6-87.0) |
|                               |                                                                                                                                                                                                              |                             |                                               |                                                    |                         |        |                  |                                                    |                         | ≥120   | 77.3 (70.9-82.3) |
| Grewal <sup>23</sup> (Canada) | Test-negative case-control (age, sex, geographic region, calendar time, prior infection, presence of outbreak at facility)                                                                                   | Dec 30, 2021 – Mar 2, 2022  | ≥60 years living in long-term care facilities | Pfizer BioNTech - Comirnaty or Moderna - mRNA-1273 |                         |        |                  | Pfizer BioNTech - Comirnaty or Moderna - mRNA-1273 | Any infection           | <84    | 45 (38-52)       |
|                               |                                                                                                                                                                                                              |                             |                                               |                                                    |                         |        |                  |                                                    |                         | ≥84    | 42 (35-48)       |
|                               |                                                                                                                                                                                                              |                             |                                               |                                                    |                         |        |                  |                                                    | Symptomatic disease     | <84    | 73 (63-81)       |
|                               |                                                                                                                                                                                                              |                             |                                               |                                                    |                         |        |                  |                                                    |                         | ≥84    | 66 (54-75)       |
|                               |                                                                                                                                                                                                              |                             |                                               |                                                    |                         |        |                  |                                                    | Hospitalization         | <84    | 87 (80-91)       |
|                               |                                                                                                                                                                                                              |                             |                                               |                                                    |                         |        |                  |                                                    |                         | ≥84    | 92 (87-95)       |
| Kim <sup>24</sup> (USA)       | Test-negative case-control (age, site, illness onset week, and prior infection status)                                                                                                                       | Oct 1, 2021 - Feb 12, 2022  | ≥18 years                                     | Pfizer BioNTech - Comirnaty or Moderna - mRNA-1273 | Symptomatic disease     | 14-149 | 45 (14-46)       |                                                    |                         |        |                  |
|                               |                                                                                                                                                                                                              |                             |                                               |                                                    |                         | ≥150   | 11 (-21-35)      |                                                    |                         |        |                  |
| Lind <sup>25</sup> (USA)      | Test-negative case-control (calendar time, age, sex, race/ethnicity, insurance, comorbidities, geographic region, prior infection, and number of non-emergent visits during the year before vaccine rollout) | Nov 1, 2021 - Jan 31, 2022  | ≥5 years                                      | Pfizer BioNTech - Comirnaty or Moderna - mRNA-1273 | Any infection           | 14-140 | 28.5 (20.0-36.2) | Pfizer BioNTech - Comirnaty or Moderna - mRNA-1273 | Any infection           | 14-59  | 54 (48-60)       |
|                               |                                                                                                                                                                                                              |                             |                                               |                                                    |                         | ≥150   | 15.3 (10.4-20.0) |                                                    |                         | 60-89  | 47 (37-56)       |
|                               |                                                                                                                                                                                                              |                             |                                               |                                                    |                         |        |                  |                                                    |                         | 90-108 | 28 (9-43)        |
| Thompson <sup>26</sup> (USA)  | Test negative case control                                                                                                                                                                                   | Aug 26, 2021 - Dec 26, 2021 | ≥18 years                                     | Pfizer BioNTech - Comirnaty                        | Emergency department or | 14-179 | 52 (46-58)       | Pfizer BioNTech - Comirnaty                        | Emergency department or | 14+    | 94 (93-95)       |
|                               |                                                                                                                                                                                                              |                             |                                               |                                                    |                         | ≥180   | 38 (32-43)       |                                                    |                         |        |                  |

|                          | (age, geographic region, calendar time, local virus circulation)                                                                          |                            |           | or Moderna - mRNA-1273                             | urgent care visits   |        |            | or Moderna - mRNA-1273                             | urgent care visits   |         |            |
|--------------------------|-------------------------------------------------------------------------------------------------------------------------------------------|----------------------------|-----------|----------------------------------------------------|----------------------|--------|------------|----------------------------------------------------|----------------------|---------|------------|
|                          |                                                                                                                                           |                            |           |                                                    | Hospitalization      |        |            |                                                    | Hospitalization      |         |            |
| Wang <sup>27</sup> (USA) | Test negative case control (age, sex, geographic region, prior infection, race/ethnicity, smoking status, comorbidities, week of testing) | Oct 1, 2021 - Jan 31, 2022 | ≥18 years | Pfizer BioNTech - Comirnaty or Moderna - mRNA-1273 | Documented infection | 14-179 | 81 (65-90) | Pfizer BioNTech - Comirnaty or Moderna - mRNA-1273 | Documented infection | 14-179  | 65 (63-66) |
|                          |                                                                                                                                           |                            |           |                                                    |                      | ≥180   | 57 (39-70) |                                                    |                      | 180-378 | 7 (4-10)   |

\*Two additional studies excluded in step 2 not included in the table: 1) [Cerqueira-Silva et al](#) (this study provides estimates of a subset of a population in a second study already included in Table 1, reference #3) and 2) [Patalon et al](#) (study provided only estimates of relative VE and are not directly comparable to other included studies).

**S6. Duration of COVID-19 primary series and first booster dose vaccine effectiveness (VE) against Omicron infection. Average percentage point decline in VE from 1 to 6 months post-vaccination from meta-regression (see S11 for methods).**

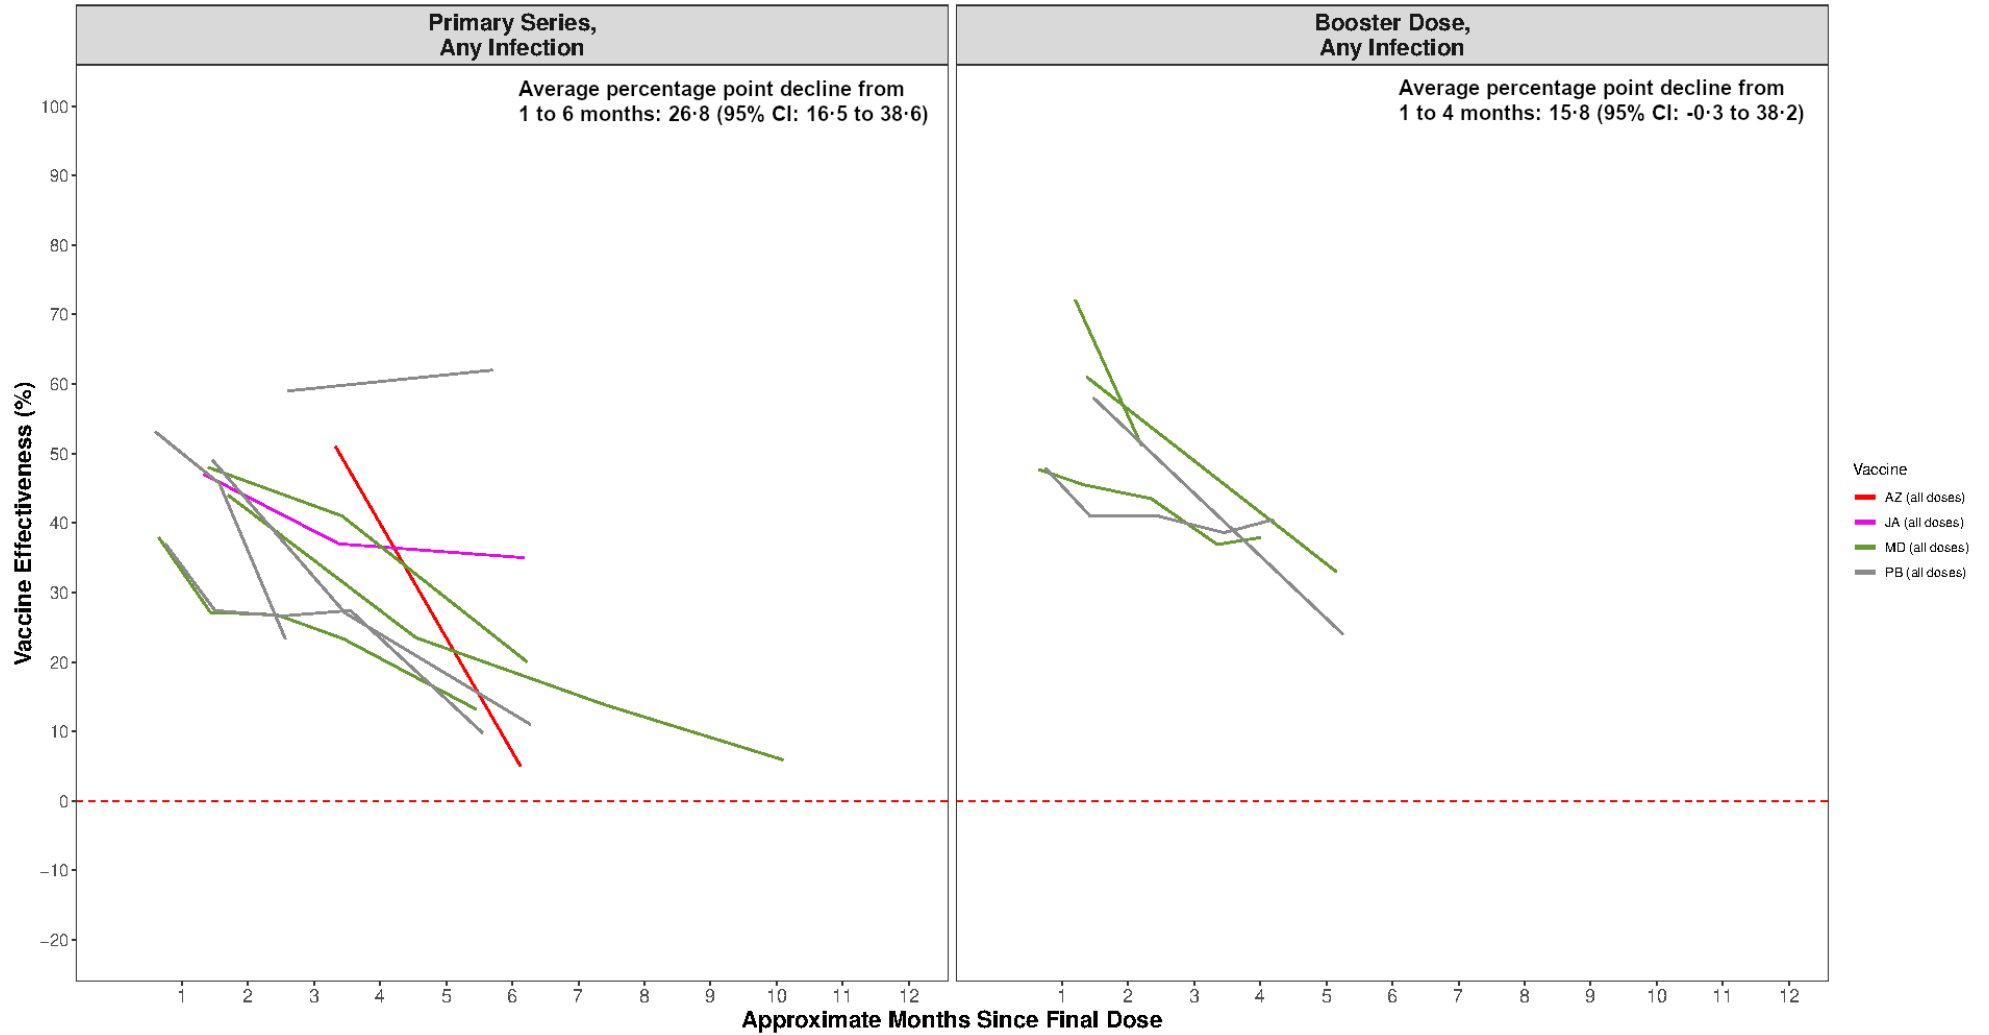

Abbreviations: AZ, AstraZeneca; JA, Janssen; MD, Moderna; PB, Pfizer BioNTech

**S7. Assessment and meta-regression on the duration of vaccine effectiveness against Omicron (main analysis)**

| Outcome                             | Primary series or booster | Number of vaccine-specific evaluations (number of studies) | Vaccines evaluated: Primary Series/Booster (number of studies)                                                                                                                                                                                                                                                                                                                                                                                                                        | Decrease in percentage points in VE from 1 to 4 months after final dose (95% CI), p value | Decrease in percentage points in VE from 1 to 6 months after final dose (95% CI), p value* |
|-------------------------------------|---------------------------|------------------------------------------------------------|---------------------------------------------------------------------------------------------------------------------------------------------------------------------------------------------------------------------------------------------------------------------------------------------------------------------------------------------------------------------------------------------------------------------------------------------------------------------------------------|-------------------------------------------------------------------------------------------|--------------------------------------------------------------------------------------------|
| <b>COVID-19 Severe Disease</b>      | Primary series            | 22 (12 <sup>‡</sup> )                                      | Pfizer BioNTech-Comirnaty (n=12)<br>Moderna-mRNA-1273 (n=3)<br>AstraZeneca-Vaxzevria (n=5)<br>Janssen-Ad26.COVS.S (n=1)<br>Sinovac-CoronaVac (n=1)                                                                                                                                                                                                                                                                                                                                    | -1.7 (-6.2 to 3.6)<br>p=0.50                                                              | 1.0 (-3.9 to 6.6)<br>p=0.70                                                                |
|                                     | Booster                   | 29 (10 <sup>‡</sup> )                                      | Pfizer BioNTech-Comirnaty/Pfizer BioNTech-Comirnaty (n=9)<br>Pfizer BioNTech-Comirnaty/Moderna-mRNA-1273 (n=4)<br>Moderna-mRNA-1273/Moderna-mRNA-1273 (n=3)<br>Moderna-mRNA-1273/Pfizer BioNTech-Comirnaty (n=1)<br>AstraZeneca-Vaxzevria/Pfizer BioNTech-Comirnaty (n=5)<br>AstraZeneca-Vaxzevria/Moderna-mRNA-1273 (n=4)<br>Janssen-Ad26.COVS.S/Janssen-Ad26.COVS.S (n=1)<br>Sinovac (CoronaVac)/Sinovac (CoronaVac) (n=1)<br>Sinovac (CoronaVac)/Pfizer BioNTech (Comirnaty) (n=1) | 5.3 (2.4 to 8.7)<br>P=0.0002                                                              | 8.2 (3.7 to 14.3)<br>p=0.0002                                                              |
| <b>COVID-19 Symptomatic Disease</b> | Primary series            | 17 (10 <sup>‡</sup> )                                      | Pfizer BioNTech-Comirnaty (n=11)<br>Moderna-mRNA-1273 (n=2)<br>AstraZeneca-Vaxzevria (n=3)<br>Sinovac-CoronaVac (n=1)                                                                                                                                                                                                                                                                                                                                                                 | 40.3 (32.4 to 49.0)<br>p<0.0001                                                           | 47.6 (36.6 to 60.2)<br>p<0.0001                                                            |
|                                     | Booster                   | 17 (6 <sup>‡</sup> )                                       | Pfizer BioNTech-Comirnaty/Pfizer BioNTech-Comirnaty (n=5)<br>Pfizer BioNTech-Comirnaty/Moderna-mRNA-1273 (n=2)<br>Moderna-mRNA-1273/Moderna-mRNA-1273 (n=2)<br>Moderna-mRNA-1273/Pfizer BioNTech-Comirnaty (n=1)<br>AstraZeneca-Vaxzevria/Pfizer BioNTech-Comirnaty (n=3)<br>AstraZeneca-Vaxzevria/Moderna-mRNA-1273 (n=2)<br>Sinovac (CoronaVac)/Sinovac (CoronaVac) (n=1)<br>Sinovac (CoronaVac)/Pfizer BioNTech (Comirnaty) (n=1)                                                  | 24.3 (19.9 to 29.1)<br>p<0.0001                                                           | 28.5 (18.3 to 40.5)<br>p<0.0001                                                            |
| <b>SARS-CoV-2 Infection</b>         | Primary series            | 9 (5)                                                      | Pfizer BioNTech-Comirnaty (n=4)<br>Moderna-mRNA-1273 (n=3)<br>AstraZeneca-Vaxzevria (n=1)<br>Janssen-Ad26.COVS.S (n=1)                                                                                                                                                                                                                                                                                                                                                                | 19.1 (11.8 to 27.3)<br>p=0.0002                                                           | 26.8 (16.5 to 38.6)<br>p=0.0001                                                            |
|                                     | Booster                   | 5 (3)                                                      | Pfizer BioNTech-Comirnaty/Pfizer BioNTech-Comirnaty (n=2)<br>Moderna-mRNA-1273/Moderna-mRNA-1273 (n=3)                                                                                                                                                                                                                                                                                                                                                                                | 15.8 (-0.3 to 38.2)<br>P=0.0537                                                           | 23.1 (0.4 to 57.7)<br>P=0.0471                                                             |

\*From meta-regression modeling log(1-VE) regressed on log(months after final dose), Appendix S11; decrease for booster doses is projected out to 6 months.

‡One study (Cerqueira-Silva et al) presents estimates separately from two different countries and is counted twice in the number of studies.

S8. Schematic of meta-regression results: average decline in COVID-19 vaccine effectiveness against severe and symptomatic disease\*

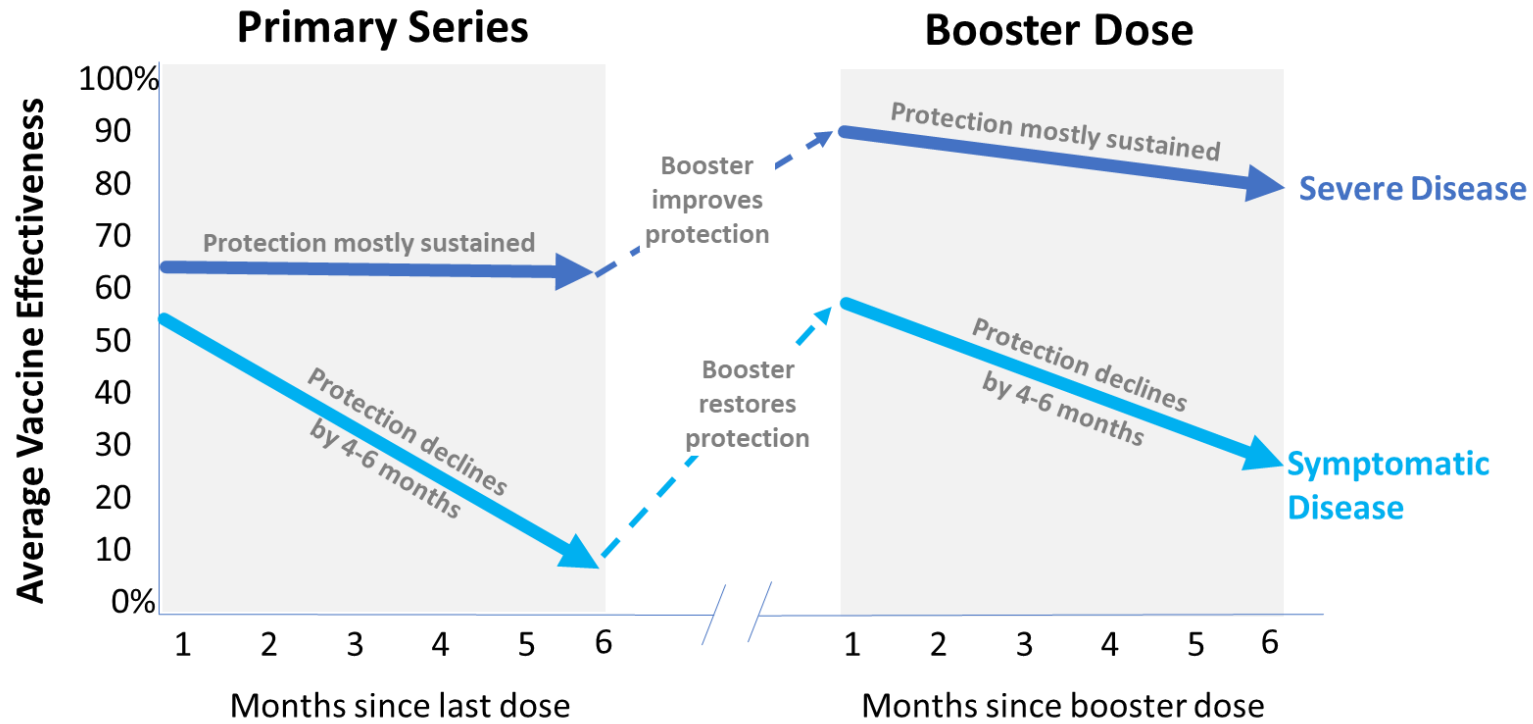

\*Illustration of the average 6-month decline in vaccine effectiveness from meta-regression results shown in S7 across all studies and all included vaccines.

## S9. PICO questions

**Participants/population:** Male and female participants of all age groups

**Intervention:** Any vaccine against COVID-19 that has received Emergency Use Listing by the World Health Organization, including only full dosing schedules

**Comparators/control:** Unvaccinated persons. For booster dose vaccine effectiveness, the comparator may also be persons having completed COVID-19 primary series vaccination. Partially vaccinated persons are excluded as comparators.

**Outcomes:** 1. Effectiveness of COVID-19 vaccines for the following outcomes: any SARS-CoV2 infection (confirmed by PCR, genomic sequencing or rapid antigen testing); any symptomatic COVID-19 disease (confirmed by PCR or genomic sequencing); severe COVID-19 disease (confirmed by PCR, genomic sequencing or rapid antigen testing), defined as hospitalisation, ICU admission, intubation, and death due to COVID-19 (confirmed by PCR, genomic sequencing or rapid antigen testing).

## S10. Methods for figure in main text

Studies that met the inclusion criteria were included in the figure of the duration of VE. A study could contribute data for any or all of the 3 outcomes (i.e., infection, symptomatic disease and severe disease), one or both age groups (i.e., all ages and older), and for multiple vaccines. In order to standardize the way in which the time period was defined for all studies, we set all time intervals as time since the final dose in days. For final time intervals that were open-ended (e.g.  $\geq 120$  days), we determined the end of the interval by calculating the maximum duration of time a participant could have been fully vaccinated in the study given the date of introduction of vaccine in the study country and the data cut-off date for testing/analysis; we then used the median time point of the interval to plot the estimate for this final period. We only present time intervals from the time we considered someone as fully vaccinated and having had time for immunologic protection to develop (i.e.,  $\geq 7$  days from the final dose for Pfizer/BioNTech-Comirnaty, and  $\geq 14$  days from the final dose for AstraZeneca-Vaxzevria, Moderna-mRNA-1273, Janssen-Ad26.COVS.2.S, and Sinovac-CoronaVac as determined in vaccine efficacy trials<sup>28-32</sup>), with some exceptions for early time intervals that includes days 0-7 or 0-14 post vaccination but for which the median time point for the interval extends beyond 7 or 14 days.

### S11: Additional methods for meta-regression

The average (mean) change in VE over time was estimated using a Gaussian linear mixed effects model for the repeated measures within each study-vaccine group (PROC MIXED; SAS 9.4). This meta-regression regressed the log of 1-VE on log of months since vaccination (to maintain a linear relationship between VE and time in months). Random intercepts and slopes were included. Standard errors (SEs) of the  $\ln(1-VE)$ s, derived from the 95% confidence intervals for the VEs reported by each study, were squared to produce estimates of residual variances for inverse weighting in the linear mixed effects model.

The SAS code used for the regression is given below. `Study_vaccine_group` refers to the multiple VE estimates over time for one vaccine in one study, represented by a line in the plots in Figure.

```
PROC MIXED cl method=reml;
CLASS study_vaccine_group;
MODEL LN_RR = ln_5months_rescaled / SOLUTION cl;
RANDOM int ln_5months_rescaled / subject=study_vaccine_group SOLUTION;
WEIGHT Inverse_SEsqrd;
REPEATED /subject=study_vaccine_group;
```

The addition of a quadratic term (i.e., square of `ln_5months_rescaled`) to the MODEL statement was also evaluated for all analyses and was retained in the model when statistically significant ( $p < .05$ ). It was statistically significant for three models: primary series severe disease, primary series symptomatic disease and booster symptomatic disease.

Confidence intervals for VE estimates of 100% were undefined in manuscripts, so SEs were approximated using formulas for SEs of the odds ratio and relative rate as relevant and adding 0.5 cases to each group to address the issue of dividing by zero:

|            | Vaccinated | Unvaccinated |
|------------|------------|--------------|
| Outcome    | a          | b            |
| No Outcome | c          | d            |

$$se_{\log OR}^{\wedge} = \sqrt{\frac{1}{(a+\frac{1}{2})} + \frac{1}{(b+\frac{1}{2})} + \frac{1}{(c+\frac{1}{2})} + \frac{1}{(d+\frac{1}{2})}}$$

$$se_{\log RR}^{\wedge} = \sqrt{\frac{c}{(a + \frac{1}{2})(a + c + 1)} + \frac{d}{(b + \frac{1}{2})(b + d + 1)}}$$

Because ln(1-VE) is not defined for estimates of VE=100%, the formulas above were also used to produce an estimate of VE <100%.

We obtained the 5-month change in predicted VE from 1 to 6 months of follow-up. Each predicted value of VE is 1-exp(predicted log relative rate). We did not directly calculate this change from the regression coefficients in the linear mixed model. A 1 unit change in the beta coefficient for Ln(time) was made to represent a period of 5 months. Each month's time value was calculated as ln[1 + (Months-1) \* (exp(1) – exp(0))/5]:

| Month | 5-month change  |                      | 3-month change |                      |
|-------|-----------------|----------------------|----------------|----------------------|
|       | Rescaled* Month | Ln(rescaled month)** | Rescaled Month | Ln(rescaled month)** |
| 1     | 1               | 0                    | 1              | 0                    |
| 2     | 1.343656366     | 0.295395             | 1.572761       | 0.4528               |
| 3     | 1.687312731     | 0.523137             | 2.145521       | 0.7634               |
| 4     | 2.030969097     | 0.708513             | 2.718282       | 1                    |
| 5     | 2.374625463     | 0.86484              | 3.291042       | 1.1912               |
| 6     | 2.718281828     | 1                    | 3.863803       | 1.3517               |

\*=1+(month-1)\*((EXP(1)-EXP(0))/5) = increments of 0.343536

\*\*used in model

The Ln of the rescaled time values have a linear relationship with Ln(RR). The VE at Month 1 = 1 - exp(intercept), and the VE at Month 6 = 1 - exp(intercept + beta coeff). The 5-month change in VE from Month 1 to 6 = VE at month 1 - VE at month 6 = exp(beta coeff) when using ln(rescaled month). The 95% lower and upper confidence bounds for the 5-month change in VE = 1-exp(upper limit of beta coeff) and 1-exp(lower limit of beta coeff). Similar logic was applied for the 3-month change analyses (i.e., month 1 to 4 after vaccination). The addition of the quadratic term to relevant models where that improved fit facilitated modeling non-linear relationships between Ln(RR) and Ln(rescaled month).

Models were run for each outcome and dosing (i.e., primary series vs booster) combination.



## S12. Risk of bias assessments

Using the ROBINS-I tool for observational studies: [www.riskofbias.com](http://www.riskofbias.com)

| Study (by first author's last name) | Bias due to confounding | Bias in selection of participants into the study | Bias in classification of interventions | Bias due to departures from intended interventions | Bias due to missing data | Bias in measurement of outcomes | Bias in selection of the reported result | Overall Bias |
|-------------------------------------|-------------------------|--------------------------------------------------|-----------------------------------------|----------------------------------------------------|--------------------------|---------------------------------|------------------------------------------|--------------|
| Baum et al                          | Moderate                | Low                                              | Low                                     | Low                                                | Low                      | Moderate                        | Moderate                                 | Moderate     |
| Buchan et al                        | Moderate                | Low                                              | Low                                     | Low                                                | Low                      | Low                             | Moderate                                 | Moderate     |
| Cerqueria Silva et al               | Moderate                | Low                                              | Low                                     | Low                                                | Low                      | Moderate                        | Moderate                                 | Moderate     |
| Chemaitelly et al                   | Serious                 | Low                                              | Low                                     | Low                                                | Low                      | Low                             | Moderate                                 | Serious      |
| Florentino et al                    | Moderate                | Low                                              | Low                                     | Low                                                | Low                      | Moderate                        | Moderate                                 | Moderate     |
| Fowlkes et al                       | Moderate                | Low                                              | Low                                     | Low                                                | Low                      | Low                             | Low                                      | Moderate     |
| Gray et al                          | Moderate                | Low                                              | Moderate                                | Low                                                | Low                      | Low                             | Low                                      | Moderate     |
| Holm Hansen et al                   | Moderate                | Low                                              | Low                                     | Low                                                | Low                      | Moderate                        | Moderate                                 | Moderate     |
| Klein et al                         | Moderate                | Low                                              | Low                                     | Low                                                | Low                      | Low                             | Low                                      | Moderate     |
| Powell et al                        | Moderate                | Low                                              | Low                                     | Low                                                | Low                      | Low                             | Moderate                                 | Moderate     |
| Price et al                         | Moderate                | Low                                              | Low                                     | Low                                                | Low                      | Low                             | Low                                      | Moderate     |
| Ranzani et al                       | Moderate                | Low                                              | Low                                     | Low                                                | Low                      | Moderate                        | Moderate                                 | Moderate     |
| Šmíd et al                          | Serious                 | Low                                              | Low                                     | Low                                                | Moderate                 | Moderate                        | Moderate                                 | Serious      |
| Stowe et al                         | Moderate                | Low                                              | Low                                     | Low                                                | Low                      | Low                             | Moderate                                 | Moderate     |
| Tartof et al                        | Serious                 | Low                                              | Low                                     | Low                                                | Low                      | Low                             | Low                                      | Serious      |
| Tseng et al                         | Moderate                | Low                                              | Low                                     | Low                                                | Low                      | Low                             | Moderate                                 | Moderate     |
| Veneti et al                        | Moderate                | Low                                              | Low                                     | Low                                                | Low                      | Moderate                        | Moderate                                 | Moderate     |
| UKHSA/Andrews et al                 | Moderate                | Low                                              | Low                                     | Low                                                | Low                      | Low                             | Moderate                                 | Moderate     |

### S13. Study definitions for symptomatic and severe disease

#### Symptomatic disease

| <b>Study</b>             | <b>Symptomatic disease definition</b>                                                                                                                                                                                                                                                                                                                                                                                                                                                                                                                                                                                                                                                                                                                                                                                                                                                                                                   |
|--------------------------|-----------------------------------------------------------------------------------------------------------------------------------------------------------------------------------------------------------------------------------------------------------------------------------------------------------------------------------------------------------------------------------------------------------------------------------------------------------------------------------------------------------------------------------------------------------------------------------------------------------------------------------------------------------------------------------------------------------------------------------------------------------------------------------------------------------------------------------------------------------------------------------------------------------------------------------------|
| Buchan et al             | At least one relevant covid-19 symptom (based on self-report or observation, such as measured temperature), at the time of testing.                                                                                                                                                                                                                                                                                                                                                                                                                                                                                                                                                                                                                                                                                                                                                                                                     |
| Cerqueira-Silva et al    | COVID-19-symptomatic infection                                                                                                                                                                                                                                                                                                                                                                                                                                                                                                                                                                                                                                                                                                                                                                                                                                                                                                          |
| Chemaitelly et al.       | Symptomatic disease was defined as a PCR- positive swab collected during the Omicron wave because of clinical suspicion due to the presence of symptoms compatible with a respiratory tract infection                                                                                                                                                                                                                                                                                                                                                                                                                                                                                                                                                                                                                                                                                                                                   |
| Florentino et al.        | COVID-19-symptomatic infection                                                                                                                                                                                                                                                                                                                                                                                                                                                                                                                                                                                                                                                                                                                                                                                                                                                                                                          |
| Klein et al.             | Emergency Department and Urgent Care encounters with COVID-19-like-illness diagnosis who received a positive SARS-CoV-2 molecular test (primary by RT-PCR) during the 14 days before through 72 hours after the encounter.<br><br>COVID-19-like-illness was defined using ICD-9 and ICD-10, and four categories of codes were considered: 1) acute respiratory illness, including COVID-19, respiratory failure, viral or bacterial pneumonia, asthma exacerbation, influenza, and viral illness not otherwise specified; 2) non-respiratory COVID-19-like illness diagnoses including cause-unspecified gastroenteritis, thrombosis, and acute myocarditis; 3) respiratory signs and symptoms consistent with COVID-19-like illness, including hemoptysis, cough, dyspnea, painful respiration, or hypoxemia; and 4) signs and symptoms of acute febrile illness. One code in any of the four categories was sufficient for inclusion. |
| Powell et al.            | Symptomatic disease: Cases who reported symptoms and gave a symptom onset date within the 10 days before a positive PCR test, tested in Pillar 2 (swab testing for the virus in the wider population, through commercial partnerships, either processed in a lab or more rapidly via LFD tests)                                                                                                                                                                                                                                                                                                                                                                                                                                                                                                                                                                                                                                         |
| Ranzani et al.           | COVID-19-symptomatic infection                                                                                                                                                                                                                                                                                                                                                                                                                                                                                                                                                                                                                                                                                                                                                                                                                                                                                                          |
| Tartof et al.            | Emergency department admission (without subsequent hospital admission) with $\geq 1$ COVID-19 symptom and a positive Kaiser Permanente Southern California (KPSC) laboratory-confirmed SARS-CoV-2 PCR test from a sample collected within 14 days prior to the initial admission date through 3 days after the admission                                                                                                                                                                                                                                                                                                                                                                                                                                                                                                                                                                                                                |
| UKHSA/<br>Andrews et al. | Positive PCR or LFT among individuals tested in Pillar 2 (community testing) who reported symptoms consistent with COVID-19 (high temperature, new continuous cough, or loss or change in sense of smell or taste)                                                                                                                                                                                                                                                                                                                                                                                                                                                                                                                                                                                                                                                                                                                      |

#### Severe disease

| <b>Study</b>           | <b>Severe disease definition</b>                                                                                                                                                                                                                                                         |
|------------------------|------------------------------------------------------------------------------------------------------------------------------------------------------------------------------------------------------------------------------------------------------------------------------------------|
| Baum et al.            | Any inpatient encounter with a primary diagnosis of Covid-19, acute respiratory tract infection, or severe complications of lower respiratory tract infections                                                                                                                           |
| Buchan et al.          | Hospitalization or death (specific guidance is provided to report only hospitalizations due to COVID, i.e. persons who received treatment for COVID-19)                                                                                                                                  |
| Cerqueira-Silva et al. | COVID-19 hospital admission or death. COVID-19 hospitalization was defined as a positive specimen being collected up to 14 days before to three days after the hospital admission; cases of COVID-19 death were defined by death occurring within 28 days of the sample collection date. |
| Chemaitelly et al.     | WHO definitions of severe, critical and death from COVID-19:                                                                                                                                                                                                                             |

|                   |                                                                                                                                                                                                                                                                                                                                                                                                                                                                                                                                                                                                                                                                                                                                                                                                                                                                                                                                                                                                                                                                                                                                                                                                                                                                                                                                                                                                                                                                          |
|-------------------|--------------------------------------------------------------------------------------------------------------------------------------------------------------------------------------------------------------------------------------------------------------------------------------------------------------------------------------------------------------------------------------------------------------------------------------------------------------------------------------------------------------------------------------------------------------------------------------------------------------------------------------------------------------------------------------------------------------------------------------------------------------------------------------------------------------------------------------------------------------------------------------------------------------------------------------------------------------------------------------------------------------------------------------------------------------------------------------------------------------------------------------------------------------------------------------------------------------------------------------------------------------------------------------------------------------------------------------------------------------------------------------------------------------------------------------------------------------------------|
|                   | <p>Severe disease definition: SARS-CoV-2 infected person with “oxygen saturation of &lt;90% on room air, and/or respiratory rate of &gt;30 breaths/minute in adults and children &gt;5 years old (or ≥60 breaths/minute in children &lt;2 months old or ≥50 breaths/minute in children 2-11 months old or ≥40 breaths/minute in children 1–5 years old), and/or signs of severe respiratory distress (accessory muscle use and inability to complete full sentences, and, in children, very severe chest wall indrawing, grunting, central cyanosis, or presence of any other general danger signs)”.</p> <p>Critical disease definition: SARS-CoV-2 infected person with “acute respiratory distress syndrome, sepsis, septic shock, or other conditions that would normally require the provision of life sustaining therapies such as mechanical ventilation (invasive or non-invasive) or vasopressor therapy”</p> <p>COVID-19 death definition: death resulting from a clinically compatible illness, in a probable or confirmed COVID-19 case, unless there is a clear alternative cause of death that cannot be related to COVID-19 disease (e.g. trauma). There should be no period of complete recovery from COVID-19 between illness and death. A death due to COVID-19 may not be attributed to another disease (e.g. cancer) and should be counted independently of preexisting conditions that are suspected of triggering a severe course of COVID-19.</p> |
| Florentino et al. | Hospitalizations reported through the SIVEP-Gripe system which reports cases of severe acute respiratory infection, which can be defined as an acute respiratory infection with onset, within the past 10 days, of fever and cough, and typically requires hospitalization.                                                                                                                                                                                                                                                                                                                                                                                                                                                                                                                                                                                                                                                                                                                                                                                                                                                                                                                                                                                                                                                                                                                                                                                              |
| Gray et al.       | COVID-19-related hospital admission                                                                                                                                                                                                                                                                                                                                                                                                                                                                                                                                                                                                                                                                                                                                                                                                                                                                                                                                                                                                                                                                                                                                                                                                                                                                                                                                                                                                                                      |
| Hansen et al.     | Any hospital admission lasting at least 12 hours and occurring no earlier than two days before, and no later than 14 days after, a positive PCR test                                                                                                                                                                                                                                                                                                                                                                                                                                                                                                                                                                                                                                                                                                                                                                                                                                                                                                                                                                                                                                                                                                                                                                                                                                                                                                                     |
| Price et al.      | Hospitalization with COVID 19 as primary reason for admission or with a clinical syndrome consistent with acute COVID-19: one or more fever, cough, shortness of breath, loss of taste, loss of smell, gastrointestinal symptoms, receipt of respiratory support, or new pulmonary findings on chest imaging.                                                                                                                                                                                                                                                                                                                                                                                                                                                                                                                                                                                                                                                                                                                                                                                                                                                                                                                                                                                                                                                                                                                                                            |
| Ranzani et al.    | Hospitalizations reported through the SIVEP-Gripe system which reports cases of severe acute respiratory infection, which can be defined as an acute respiratory infection with onset, within the past 10 d, of fever and cough, and typically requires hospitalization.                                                                                                                                                                                                                                                                                                                                                                                                                                                                                                                                                                                                                                                                                                                                                                                                                                                                                                                                                                                                                                                                                                                                                                                                 |
| Šmíd et al.       | Hospitalization: Hospital admission of a person, who tested positive on a PCR test, within two weeks after the confirmed infection or earlier                                                                                                                                                                                                                                                                                                                                                                                                                                                                                                                                                                                                                                                                                                                                                                                                                                                                                                                                                                                                                                                                                                                                                                                                                                                                                                                            |
| Stowe et al.      | Hospitalization for at least 2 days stay and ARI code in primary diagnostic field.                                                                                                                                                                                                                                                                                                                                                                                                                                                                                                                                                                                                                                                                                                                                                                                                                                                                                                                                                                                                                                                                                                                                                                                                                                                                                                                                                                                       |
| Tartof et al.     | Hospitalization: Hospital admission with ≥1 COVID-19 symptom and a positive Kaiser Permanente Southern California (KPSC) laboratory-confirmed SARS-CoV-2 PCR test from a sample collected within 14 days prior to the initial admission date through 3 days after the admission                                                                                                                                                                                                                                                                                                                                                                                                                                                                                                                                                                                                                                                                                                                                                                                                                                                                                                                                                                                                                                                                                                                                                                                          |

#### S14. References for Supplementary Materials

1. Baum U, Poukka E, Leino *et al.* High vaccine effectiveness against severe Covid-19 in the elderly in Finland before and after the emergence of Omicron. *medRxiv* 2022; published online Mar 13. <https://doi.org/10.1101/2022.03.11.22272140> (preprint).
2. Buchan SA, Nguyen L, Wilson SE, *et al.* Vaccine effectiveness of BNT162b2 against Omicron and Delta outcomes in adolescents. *medRxiv* 2022; published online Apr 7. <https://doi.org/10.1101/2021.12.30.21268565> (preprint).
3. Cerqueira-Silva T, Shah SA, Robertson C, *et al.* Waning of mRNA Boosters after Homologous Primary Series with BNT162b2 or ChadOx1 Against Symptomatic Infection and Severe COVID-19 in Brazil and Scotland: A Test-Negative Design Case-Control Study. *SSRN* 2022; published online Apr 14. <http://dx.doi.org/10.2139/ssrn.4082927> (preprint).
4. Chemaitelly H, Ayoub HH, AlMukdad S, *et al.* Duration of protection of BNT162b2 and mRNA-1273 COVID-19 vaccines against symptomatic SARS-CoV-2 Omicron infection in Qatar. *medRxiv* 2022; published online Feb 8. <https://doi.org/10.1101/2022.02.07.22270568> (preprint).
5. Florentino PTV, Millington T, Cerqueira-Silva T, *et al.* Vaccine Effectiveness of Two-Dose BNT162b2 Over Time Against COVID-19 Symptomatic Infection and Severe Cases Among Adolescents: Test Negative Design Case Control Studies in Brazil and Scotland. Rochester, NY. *SSRN* 2022; published online Apr 5. <http://dx.doi.org/10.2139/ssrn.4074678> (preprint).
6. Fowlkes AL, Yoon SK, Lutrick K, *et al.* Effectiveness of COVID-19 Vaccines in Preventing SARS-CoV-2 Infection Among Frontline Workers Before and During B.1.617.2 (Delta) Variant Predominance — Eight U.S. Locations, December 2020–August 2021. *MMWR Morb Mortal Wkly Rep* 2021; **70**. <https://doi.org/10.15585/mmwr.mm7034e4>.
7. Gray GE, Collie S, Garrett N, *et al.* Vaccine effectiveness against hospital admission in South African health care workers who received a homologous booster of Ad26.COVID during an Omicron COVID-19 wave: Preliminary Results of the Sisonke 2 Study. *medRxiv* 2021; published online Dec 29. <https://doi.org/10.1101/2021.12.28.21268436> (preprint).
8. Hansen C, Schelde A, Moustsen-Helm I, *et al.* Vaccine effectiveness against infection and COVID-19-associated hospitalisation with the Omicron (B.1.1.529) variant after vaccination with the BNT162b2 or mRNA-1273 vaccine: A nationwide Danish cohort study. *Research Square* 2022; published online March 30. <https://doi.org/10.21203/rs.3.rs-1486018/v1> (preprint).
9. Klein NP, Stockwell MS, Demarco M, *et al.* Effectiveness of COVID-19 Pfizer-BioNTech BNT162b2 mRNA Vaccination in Preventing COVID-19–Associated Emergency Department and Urgent Care Encounters and Hospitalizations Among Nonimmunocompromised Children and Adolescents Aged 5–17 Years — VISION Network, 10 States, April 2021–January 2022. *MMWR Morb Mortal Wkly Rep* 2022; **71**:352–358.
10. Powell AA, Kirsebom F, Stowe J, *et al.* Adolescent vaccination with BNT162b2 (Comirnaty, Pfizer-BioNTech) vaccine and effectiveness against COVID-19: national test-negative case-control study, England. *medRxiv* 2022; published online Feb 18. <https://doi.org/10.1101/2021.12.10.21267408> (preprint).
11. Price AM, Olson SM, Newhams MM, *et al.* BNT162b2 Protection against the Omicron Variant in Children and Adolescents. *N Engl J Med* 2022; published online March 30. <https://doi.org/10.1056/NEJMoa2202826>.

12. Šmíd M, Berek L, Májek O, et al. Protection by vaccines and previous infection against the Omicron variant of SARS-CoV-2. *medRxiv* 2022, published online Feb 25. <https://doi.org/10.1101/2022.02.24.22271396> (preprint).
13. Ranzani OT, Hitchings MDT, de Melo RL, et al. Effectiveness of an Inactivated Covid-19 Vaccine with Homologous and Heterologous Boosters against the Omicron (B.1.1.529) Variant. *medRxiv* 2022, published online Apr 1. <https://doi.org/10.1101/2022.03.30.22273193> (preprint).
14. Stowe J, Andrews N, Kirsebom F, Ramsay M, Bernal JL. Effectiveness of COVID-19 vaccines against Omicron and Delta hospitalisation: test negative case-control study. *medRxiv* 2022; published online Apr 1. <https://doi.org/10.1101/2022.04.01.22273281> (preprint).
15. Tartof SY, Slezak JM, Puzniak L, et al. Durability of BNT162b2 vaccine against hospital and emergency department admissions due to the omicron and delta variants in a large health system in the USA: a test-negative case-control study. *The Lancet Respiratory Medicine* 2022; published online April 22. [https://doi.org/10.1016/S2213-2600\(22\)00101-1](https://doi.org/10.1016/S2213-2600(22)00101-1) (in press).
16. Tseng HF, Ackerson BK, Luo Y, et al. Effectiveness of mRNA-1273 against SARS-CoV-2 omicron and delta variants. *medRxiv* 2022; published online Feb 18. <https://doi.org/10.1101/2022.01.07.22268919> (preprint).
17. UK Health Security Agency. COVID-19 vaccine surveillance report - week 4. Jan 27, 2021. [https://assets.publishing.service.gov.uk/government/uploads/system/uploads/attachment\\_data/file/1050721/Vaccine-surveillance-report-week-4.pdf](https://assets.publishing.service.gov.uk/government/uploads/system/uploads/attachment_data/file/1050721/Vaccine-surveillance-report-week-4.pdf) (accessed Mar 18, 2022).
18. Andrews N, Stowe J, Kirsebom F, et al. Covid-19 Vaccine Effectiveness against the Omicron (B.1.1.529) Variant. *New Engl J Med* 2022; 0: null.
19. Veneti L, Berild JD, Wattle SV, et al. Vaccine effectiveness with BNT162b2 (Comirnaty, Pfizer-BioNTech) vaccine against reported SARS-CoV-2 Delta and Omicron infection among adolescents, Norway, August 2021 to January 2022. *medRxiv* 2022; published online Mar 25. <https://doi.org/10.1101/2022.03.24.22272854> (preprint).
20. Buchan SA, Chung H, Brown KA, et al. Effectiveness of COVID-19 vaccines against Omicron or Delta infection. *medRxiv* 2022; published online Jan 28. <https://doi.org/10.1101/2021.12.30.21268565> (preprint).
21. Ferdinands JM. Waning 2-Dose and 3-Dose Effectiveness of mRNA Vaccines Against COVID-19–Associated Emergency Department and Urgent Care Encounters and Hospitalizations Among Adults During Periods of Delta and Omicron Variant Predominance — VISION Network, 10 States, August 2021–January 2022. *MMWR Morb Mortal Wkly Rep* 2022; **71**. <https://doi.org/10.15585/mmwr.mm7107e2>.
22. Gram MA, Emborg H-D, Schelde AB, et al. Vaccine effectiveness against SARS-CoV-2 infection and COVID-19-related hospitalization with the Alpha, Delta and Omicron SARS-CoV-2 variants: a nationwide Danish cohort study. *medRxiv* 2022; published online April 20. <https://doi.org/10.1101/2022.04.20.22274061> (preprint).
23. Grewal R, Kitchen SA, Nguyen L, et al. Effectiveness of a Fourth Dose of COVID-19 Vaccine among Long-Term Care Residents in Ontario, Canada. *medRxiv* 2022; published online Apr 18. <https://doi.org/10.1101/2022.04.15.22273846> (preprint).

24. Kim SS, Chung JR, Talbot HK, *et al.* Effectiveness of 2 and 3 mRNA COVID-19 Vaccines Doses against Omicron and Delta-Related Outpatient Illness among Adults, October 2021 – February 2022. *medRxiv* 2022; published online Apr 10. <https://doi.org/10.1101/2022.04.06.22273535> (preprint).
25. Lind ML, Robertson AJ, Silva J, *et al.* Effectiveness of Primary and Booster COVID-19 mRNA Vaccination against Omicron Variant SARS-CoV-2 Infection in People with a Prior SARS-CoV-2 Infection. *medRxiv* 2022; published online Apr 25. <https://doi.org/10.1101/2022.04.19.22274056> (preprint).
26. Thompson CN, Hughes S, Ngai S, *et al.* Rapid Emergence and Epidemiologic Characteristics of the SARS-CoV-2 B.1.526 Variant - New York City, New York, January 1-April 5, 2021. *MMWR Morb Mortal Wkly Rep* 2021; 70: 712–6.
27. Wang X, Zein J, Ji X, Lin D, *et al.* Impact of Vaccination, Prior Infection, and Therapy on Delta and Omicron Variants. *medRxiv* 2022; published online Mar 25. <https://doi.org/10.1101/2022.03.24.22272901> (preprint).
28. Polack FP, Thomas SJ, Kitchin N, *et al.* Safety and Efficacy of the BNT162b2 mRNA Covid-19 Vaccine. *New England Journal of Medicine* 2020; **383**: 2603–15.
29. Baden LR, Sahly HME, Essink B, *et al.* Covid-19 in the Phase 3 Trial of mRNA-1273 During the Delta-variant Surge. 2021. *New England Journal of Medicine* 2021; **384**:403-416.
30. Voysey M, Clemens SAC, Madhi SA, *et al.* Single-dose administration and the influence of the timing of the booster dose on immunogenicity and efficacy of ChAdOx1 nCoV-19 (AZD1222) vaccine: a pooled analysis of four randomised trials. *The Lancet* 2021; **397**: 881–91.
31. Sadoff J, Gray G, Vandebosch A, *et al.* Safety and Efficacy of Single-Dose Ad26.COV2.S Vaccine against Covid-19. *New England Journal of Medicine* 2021; **384**:2187-2201.
32. Tanriover MD, Doğanay HL, Akova M, *et al.* Efficacy and safety of an inactivated whole-virion SARS-CoV-2 vaccine (CoronaVac): interim results of a double-blind, randomised, placebo-controlled, phase 3 trial in Turkey. *The Lancet* 2021; **398**: 213–22.
